# Supplementary material for: Supramolecular Polymer Intertwined Free-Standing Bifunctional Membrane Catalysts for All-Temperature Flexible Zn–Air Batteries
Source: PubMed Central journal article supplement (PMC9482563; doi:10.1007/s40820-022-00927-0), 2022-09-17
Supplement: 40820_2022_927_MOESM1_ESM.pdf [file 40820_2022_927_MOESM1_ESM.pdf]

Supporting Information for

## Supramolecular-Polymer Intertwined Free-Standing Bifunctional Membrane Catalysts for All-Temperature Flexible Zn-Air Batteries

Nayantara K. Wagh<sup>1, #</sup>, Sambhaji S. Shinde<sup>1, #</sup>, Chi Ho Lee<sup>2</sup>, Sung-Hae Kim<sup>1</sup>, Dong-Hyung Kim<sup>1</sup>, Han-Don Um<sup>3</sup>, Sang Uck Lee<sup>2, \*</sup>, Jung-Ho Lee<sup>1, \*</sup>

<sup>1</sup>Department of Materials Science and Chemical Engineering, Hanyang University, Ansan, Republic of Korea

<sup>2</sup>Department of Applied Chemistry, Center for Bionano Intelligence Education and Research, Hanyang University, Ansan, Republic of Korea

<sup>3</sup>Department of Chemical Engineering, Kangwon National University, Chuncheon, Gangwon 24341, Republic of Korea

\*Corresponding authors. E-mail: [jungho@hanyang.ac.kr](mailto:jungho@hanyang.ac.kr) (JHL); [sulee@hanyang.ac.kr](mailto:sulee@hanyang.ac.kr) (SUL)

### S1 Note S1: Experimental Methods

#### S1.1 Catalyst Preparation

##### *Chemicals*

Melamine (C<sub>3</sub>H<sub>6</sub>N<sub>6</sub>), polyvinyl alcohol ((C<sub>2</sub>H<sub>4</sub>O)<sub>x</sub>), polyacrylic acid ((C<sub>3</sub>H<sub>4</sub>O<sub>2</sub>)<sub>n</sub>), Poly(ethylene-alt-maleic anhydride) (M<sub>w</sub> 100,000-500,000), ammonium thiosulfate, guanosine, and nafion were obtained with the Sigma-Aldrich. Ethylene glycol (C<sub>2</sub>H<sub>6</sub>O<sub>2</sub>), ethanol (C<sub>2</sub>H<sub>5</sub>OH), acetone, potassium hydroxide (KOH), sulfuric acid (H<sub>2</sub>SO<sub>4</sub>), zinc acetate (Zn(OAc)<sub>2</sub>), and nitric acid (HNO<sub>3</sub>) were attained from Daejung Chemicals. Carbon paper and carbon cloth (Spectra carb 2040-A, Fuel Cell Store), and Zn plate (Sigma-Aldrich, USA) were used as received. All precursors were used without further purifications. Deionized water was utilized as solvent until otherwise specifically mentioned. Received resources were applied further without distillation.

##### *Synthesis of reference Pt/C catalysts*

Poly(N-vinyl-2-pyrrolidone) (M<sub>w</sub> = 40,000) was treated with an appropriate amount of chloroplatinic acid (H<sub>2</sub>PtCl<sub>6</sub>·6H<sub>2</sub>O) solution under vigorous stirring, followed by the addition of activated carbon. After that, the sodium borohydride (NaBH<sub>4</sub>) solution was appended to the reaction mixture and kept under stirring for another 30 min. Finally, the obtained mixture was collected after centrifugation and several cleanings with deionized water and dried at 60 °C for 12 h.

##### *Synthesis of the RuO<sub>2</sub> catalysts*

The ruthenium (III) chloride hydrate (50 mM) was dispersed in the mixture of methyl alcohol and water (1:1 v/v) under vigorous stirring. Further, the sodium hydroxide (NaOH, 2 M) was inserted drop wisely in the above reaction mixture until the pH of the solution became 7. The product was centrifuged, rinsed with deionized water, and dehydrated for 60 °C, followed by annealing at 500 °C for 5 h in air.

#### S1.2 Characterization of the Prepared Catalysts

Powder X-ray diffraction (PXRD) patterns were measured on Rigaku Smartlab D/max 2500Pc diffractometer with Cu K $\alpha$  radiation (wavelength of 1.5406 Å). Morphology images were performed by field-emission scanning electron microscopy (FESEM, JEOL-6700F). Transmission electron microscopy (TEM) images were acquired on a Cs-corrected Titan<sup>TM</sup>

80-300 with an accelerating voltage of 80 kV. Elemental composition maps were recorded by an EDS attached to the TEM. FTIR measurements were performed on a Perkin Elmer GX spectrometer. The nitrogen sorption measurements were conducted on an AUTOSORB-1-MP surface area and pore size analyzer using a liquid nitrogen bath (77 K). The surface volume, area, and pore profiles were analyzed from the adsorption and desorption branches by the Brunauer-Emmett-Teller (BET) and Barrett-Joyner-Halenda (BJH) methods. X-ray photoelectron spectroscopy (XPS) was performed on a VG SCIENTA (R 3000) spectrometer equipped with a monochromatic Al  $K\alpha$  source.

### S1.3 Electrochemical Measurements

The electrochemical performances were performed on an electrochemical workstation (CHI 760 D, CH Instruments) at room temperature with a typical three-electrode electrochemical cell. The Ag/AgCl (with saturated KCl) reference electrode, a graphite rod as the counter electrode, a glassy carbon (GC) rotating disk electrode (RDE, 0.196 cm<sup>2</sup>) coated with the catalysts as the working electrode, and 0.1 M aqueous KOH (oxygen-rich) as the electrolyte. The working electrode was fabricated with as-obtained PEMAC@NDCN or PVA@NDCN or PAA@NDCN catalysts punched over the GC using nafion adhesive (5 wt%, 2  $\mu$ L) and then dried at room temperature for several hours. For comparison, Pt/C and RuO<sub>2</sub> reference materials inks were prepared by dispersing 10 mg of catalysts in the propanol of 1.95 ml and nafion of 50  $\mu$ L. Then, 6  $\mu$ L of the prepared inks were evenly loaded on the GC surface and dried for room temperature. Mass loading for both fabricated catalysts was fixed to be 0.15 mg cm<sup>-2</sup> for both oxygen reactions. Prior to the ORR/OER measurements, the electrolyte (0.1 M KOH) was saturated by oxygen, nitrogen flow for 30 min. CVs were performed in O<sub>2</sub> and N<sub>2</sub>-saturated electrolyte with a scan rate of 50 mV s<sup>-1</sup>. LSV profiles for ORR/OER were obtained for 1600 rpm with a scan rate of 5 mV s<sup>-1</sup> in the potential range of 0.2-2 V vs. RHE. Chronoamperometric half-cell reactions durability was evaluated at the respective overpotentials for OER and half-wave potential for ORR. The measured potentials were referenced to the reversible hydrogen electrode (RHE) according to the Nernst equation,

$$E_{\text{RHE}} = E_{\text{Ag/AgCl}} + 0.059 \times \text{pH} + 0.205 \quad (\text{S1})$$

Performed current densities were also referenced according to the measured geometric surface areas. Electrochemical impedance spectra were obtained for the frequency range of 100 Hz to 1 MHz with a constant bias of 0.2 V. The long-life durability of the catalysts was measured by continuous potentiodynamic sweeps for a scan rate of 100 mV s<sup>-1</sup>. The mass loading of membrane catalysts and reference Pt/C/RuO<sub>2</sub> has been placed identically unless otherwise stated (0.15 mg cm<sup>-2</sup>).

### S1.4 Oxygen Reduction Reaction Kinetics

The ORR kinetics were evaluated by using different rotational speed LSV profiles. The measured total current density is the sum of inverse of kinetic current ( $J_K$ ) and diffusion current ( $J_d$ ). Every atom or ion on the electrode reacts immediately as the applied overpotential is sufficiently high. The number of oxygen molecules at the electrode surface is almost zero, facilitating diffusion-limiting plateau. Therefore, the diffusion current is related only to the RDE rotational speeds.

The transferred electron number ( $n$ ) in oxygen reduction was determined according to the Koutecky-Levich (K-L) equation [S1-S3]:

$$\frac{1}{J} = \frac{1}{J_K} + \frac{1}{B\omega^{1/2}} \quad (\text{S2})$$

$$B = 0.2nF(D_{O_2})^{2/3}\nu^{-1/6}C_{O_2} \quad (S3)$$

where  $B$  represents the Levich slope,  $J_K$  represents the kinetic current,  $J$  represents the measured total current,  $\omega$  represents the electrode rotation rate,  $n$  represents the number of electrons transferred for each oxygen molecule,  $F$  represents the Faraday constant ( $F = 96485 \text{ C mol}^{-1}$ ),  $D_{O_2}$  represents the  $O_2$  diffusion coefficient in 0.1 M KOH ( $D_{O_2} = 1.9 \times 10^{-5} \text{ cm}^2 \text{ s}^{-1}$ ),  $\nu$  represents the kinetic viscosity ( $0.01 \text{ cm}^2 \text{ s}^{-1}$ ) and  $C_{O_2}$  represents the concentration of  $O_2$  ( $C_{O_2} = 1.2 \times 10^{-6} \text{ mol}^{-1} \text{ cm}^{-3}$ ). The considered rotation speeds are in rpm, and therefore, the constant factor 0.2 is multiplied. The peroxide species during ORR reactions were determined by measuring the RRDE polarization profiles for the ring potential of 1.3 V vs. RHE. Based on the following expressions, the transferred electron number ( $n$ ) and peroxide ( $H_2O_2$ ) yield were evaluated as [S4]:

$$n = 4 \frac{I_d}{I_d + I_r/N} \quad (S4)$$

$$H_2O_2 (\%) = 100 \frac{2I_r/N}{I_d + I_r/N} \quad (S5)$$

where  $I_r$  represents the ring current,  $I_d$  represents the disk current, and  $N$  represents the current collection efficiency of the Pt ring.  $N$  was determined to be 0.42.

## S1.5 Fabrication of Zn-air Batteries

### *Alkaline Zn-air batteries*

The rechargeable Zn-air battery performance was analyzed on home-built electrochemical cells. Air cathodes were constructed by uniform punching of PEMAC@NDCN membrane (1 cm × 1 cm) and carbon paper was utilized as current collectors. Further, for comparison, Pt/C + RuO<sub>2</sub> catalyst slurry was fabricated by mixing carbon black, polytetrafluoroethylene, and the catalysts (1:1:8 w/w) in ethanol/Nafion solution. The mass loadings of the PEMAC@NDCN and reference Pt/C+RuO<sub>2</sub> catalysts for rechargeable ZABs was 1 mg cm<sup>-2</sup>. Mass ratio of reference Pt/C and RuO<sub>2</sub> was of 1:1. Here, 6 M KOH and 0.2 M zinc acetate was used as the electrolyte for the reversible electrochemical reactions. Catalyst-loaded (Pt/C+RuO<sub>2</sub>) carbon paper was used as an air cathode and polished Zn plate (0.5 mm thickness) as anode.

### *Flexible solid-state Zn-air batteries*

Flexible Zn-air batteries were fabricated by including PEMAC@NDCN membrane catalysts as the air cathodes, the chitosan biocellulosics (CBCs fabricated as per our previous reference<sup>1</sup>) as the solid electrolyte (50 μm in thickness), and Zn foil (0.3 mm) as the anode. Then, membrane catalysts and zinc foils were positioned on opposite sides of the bio-cellulose membrane electrolyte, without any external current collector. Finally, the assembled devices were pressed cautiously and encapsulated with sustainable latex. For comparison, Pt/C + RuO<sub>2</sub> catalyst slurry was also fabricated by mixing carbon black, polytetrafluoroethylene, and the catalysts (1:1:8 w/w) in ethanol/Nafion solution. The mass loadings of the PEMAC@NDCN and reference Pt/C+RuO<sub>2</sub> catalysts for rechargeable ZABs was 2 mg cm<sup>-2</sup> and electrode area of 2 cm<sup>2</sup>.

### *Battery testing*

All the fabricated ZABs were evaluated under atmospheric conditions. The galvanostatic discharge and charge voltage profiles were conducted on a LAND CT2001A multichannel

battery testing system. The cycling for alkaline and flexible solid ZABs was performed for 10 min per cycle (discharge: 5 min; charge: 5 min) with 20 and 50 mA cm<sup>-2</sup> current density, respectively. The specific capacities were determined using the galvanostatic discharge profiles standardized to the consumed mass of Zn. The energy efficiency was calculated from the ratio of discharge to charge voltages. The power densities of both ZABs were calculated by expression as  $P = V \times I$ .

## S2 Supplementary Figures

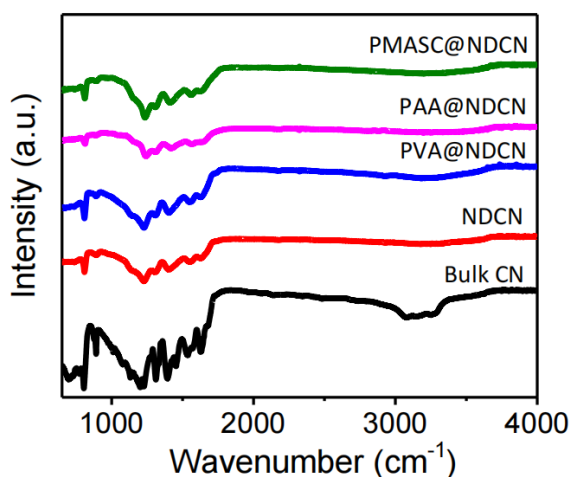

**Fig. S1** Spectroscopic characterizations. Fourier transforms IR spectra for PEMAC@NDCN compared to those of PVA@NDCN, PAA@NDCN, NDCN, and bulk CN

The molecular binding structures for PEMAC@NDCN compared to those of PVA@NDCN, PAA@NDCN, NDCN, and bulk CN are evaluated by FTIR spectra. The characteristic s-triazine ring structure breathing mode was observed for 800-891 cm<sup>-1</sup> for bulk CN, which illustrates carbon nitride frameworks [S5]. Furthermore, the decreasing intensity of s-triazine peaks for NDCN, PEMAC@NDCN, PVA@NDCN, and PAA@NDCN confirms the formation of nitrogen deficiency and loading of polymeric layers. The peaks from 1100-1600 cm<sup>-1</sup> are attributed to the stretching bindings of C-N, C=C, and C=N, which demonstrates the existence of pyridinic, pyrrolic, and graphitic nitrogen species, as evident with XPS N 1s spectra [S6]. Characteristic broad bindings over 3000-3500 cm<sup>-1</sup> corresponds to the C=C-H, C-H, stretch, amine or water bindings [S7]. Presence of electron-donating species such as ortho, para and meta phases in polymer-based NDCN structures, which suggests the enhancement for charge transfer during electrochemical reactions. The stretching vibrations for 1418 and 1327 cm<sup>-1</sup> were observed conforming to the anti-symmetric and symmetric carboxylic anions and C=C, C=O, C-H bond structures, which indicates the formation of PEMAC@NDCN. S8 PEMAC@NDCN, PVA@NDCN, and PAA@NDCN illustrates the weak binding for ~2181 cm<sup>-1</sup>, which clarifies the stretching vibrations for N=C=N and N=C=O. This illustrates the presence of pyridinic N<sup>+</sup>O<sup>-</sup> species as evident in XPS results [S9]. The variation in the C-N or C=C stretching bindings compared to those bulk CN illustrates the construction of polymeric CN structures. The presence of peaks at 1632 and 1689 cm<sup>-1</sup> corresponds to the formation of C-O or C-O-H groups from the polymeric chain. The existence of C=C, C=O, OH, C-H illustrates the negatively charged polymeric moieties attached to the surface of NDCN, which is critical for enhancing electrochemical kinetics. FTIR characterization revealed the formation of polymer-derived metal-free NDCN frameworks.

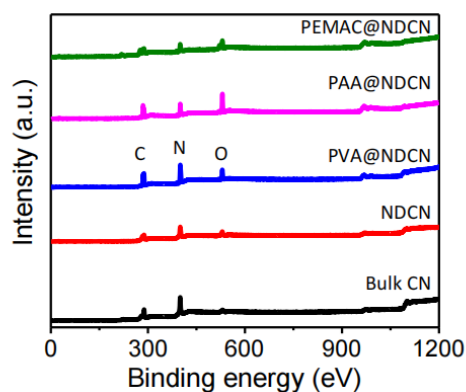

**Fig. S2** Spectroscopic characterizations. Full scan XPS spectra for designed polymeric PEMAC@NDCN, compared to those of PVA@NDCN, PAA@NDCN, NDCN, and bulk CN catalysts. Note that the representative C, N, and O are observed without further impurities, clarifying the formation of polymeric catalysts

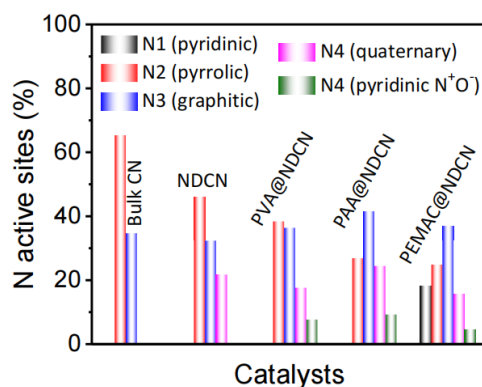

**Fig. S3** Spectroscopic characterizations. Quantitative illustrations for the obtained nitrogen species over various polymeric and CN catalysts

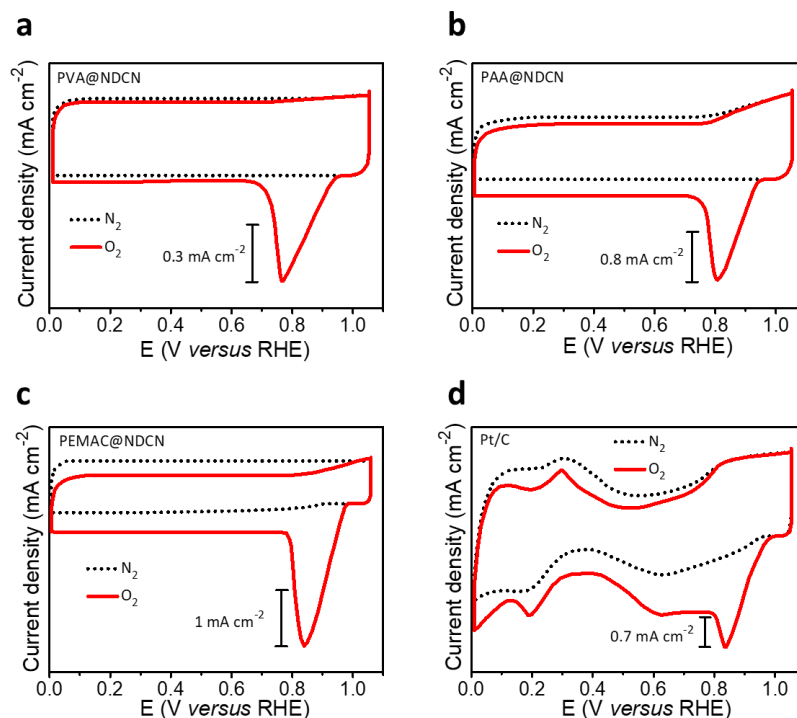

**Fig. S4** Electrochemical performance. CVs scans over  $N_2$ - (black dots) and  $O_2$ -saturated (red solid) for (a) PVA@NDCN, (b) PAA@NDCN, (c) PEMAC@NDCN, and (d) Pt/C catalysts in the 0.1 M KOH electrolyte solutions. Scan rate  $50 \text{ mV s}^{-1}$

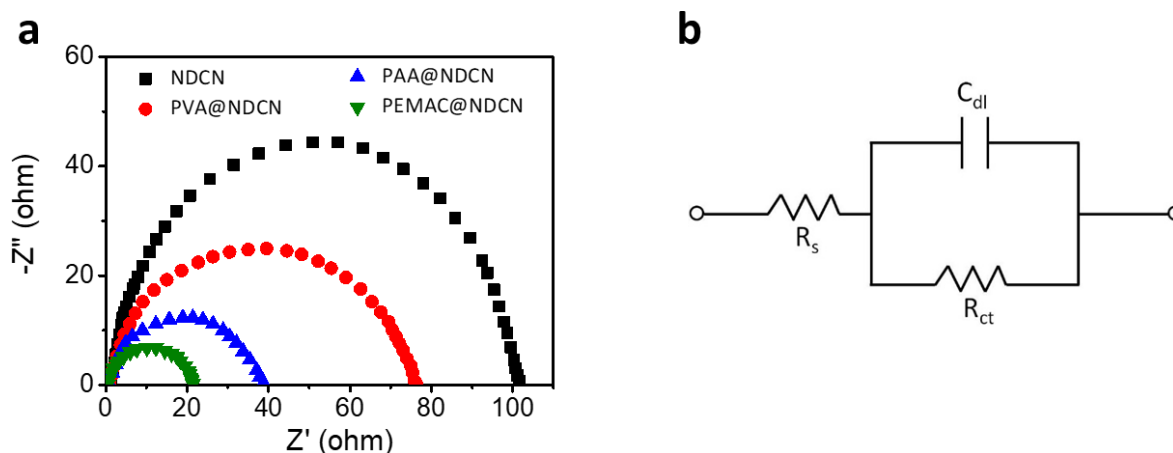

**Fig. S5** Electrochemical kinetics for ORR. (a) Electrochemical impedance spectra (EIS) for fabricated polymeric and CN catalysts during the ORR process. (b) Equivalent circuit

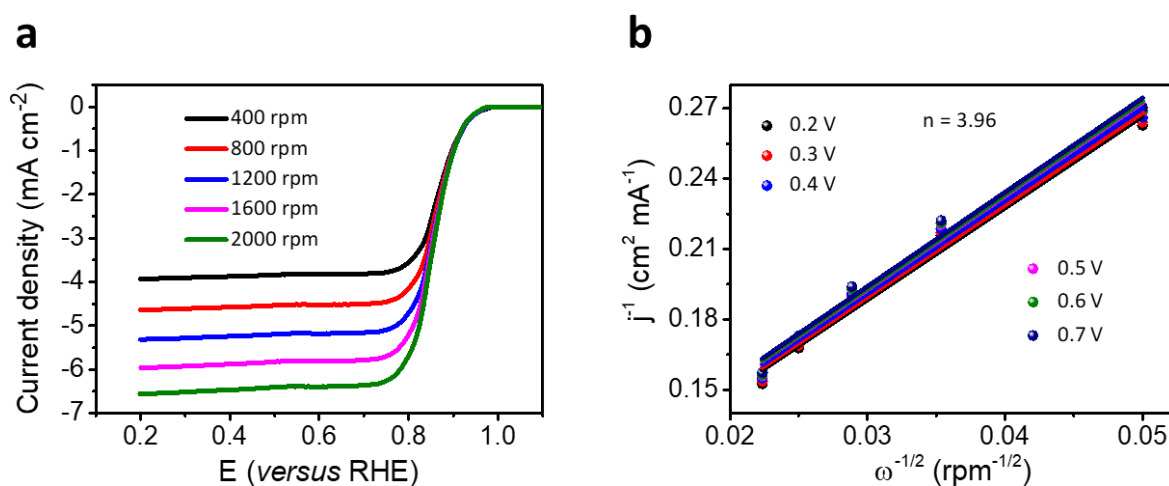

**Fig. S6** Electrochemical kinetics. (a) LSV polarizations for Pt/C during ORR from 400 to 2000 rpm sweeping rates. (b) Determined K-L plots for 0.2 to 0.7 V

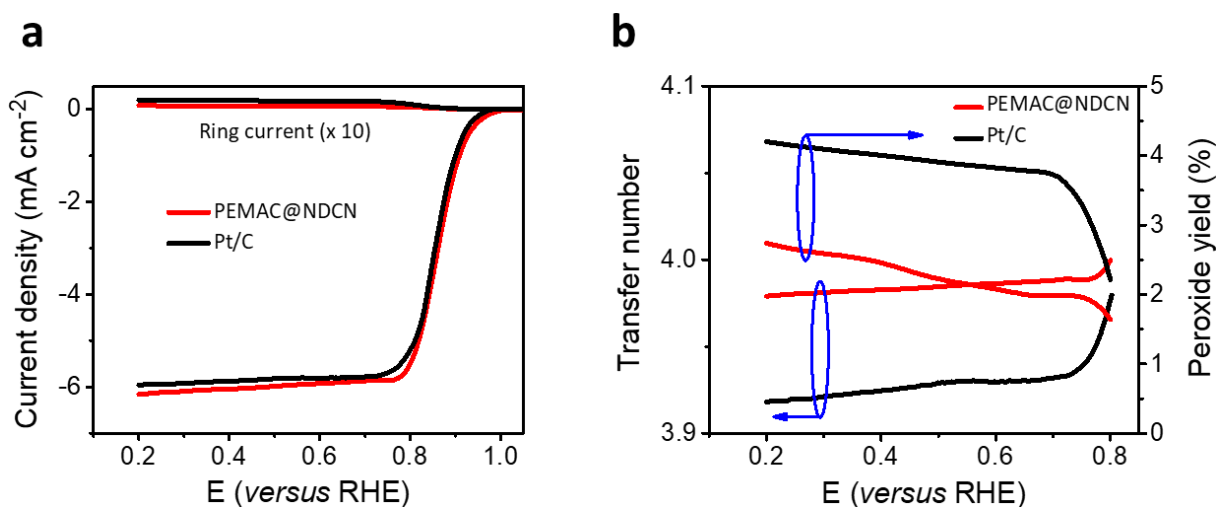

**Fig. S7** Electrochemical kinetics. (a) Ring and disc current polarizations for PEMAC@NDCN and reference Pt/C catalysts. (b) Calculated electron transfer numbers and peroxide yield for PEMAC@NDCN and reference Pt/C

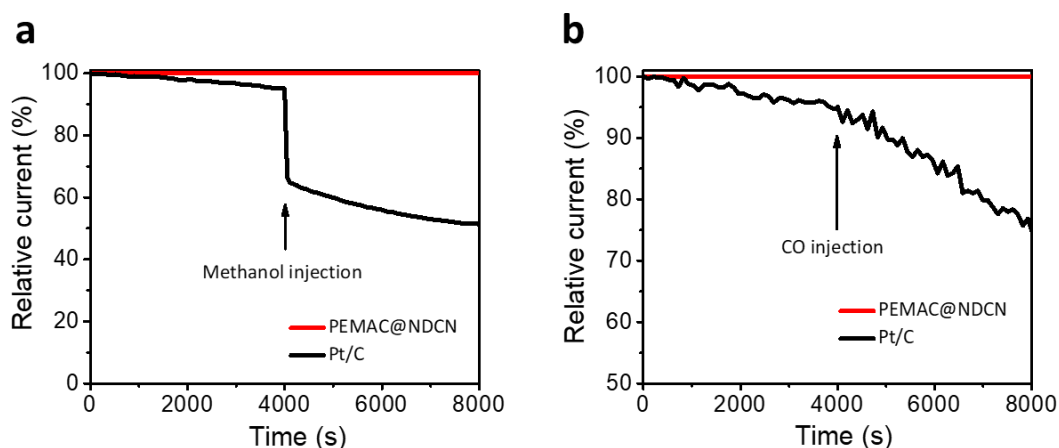

**Fig. S8** Electrochemical performance. (a) Chronoamperometric I-t stability tests against methanol (2 M) resistance for PEMAC@NDCN and Pt/C. (b) Chronoamperometric I-t stability tests against CO (10 volume %) resistance for PEMAC@NDCN and Pt/C

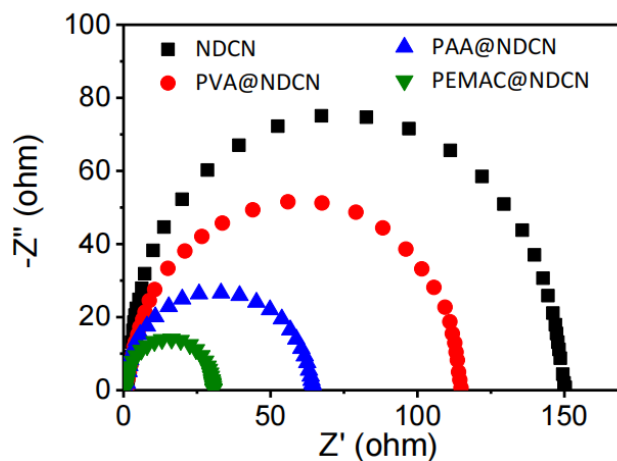

**Fig. S9** Electrochemical kinetics for OER. EIS spectra for PEMAC@NDCN, PVA@NDCN, PAA@NDCN, and NDCN materials

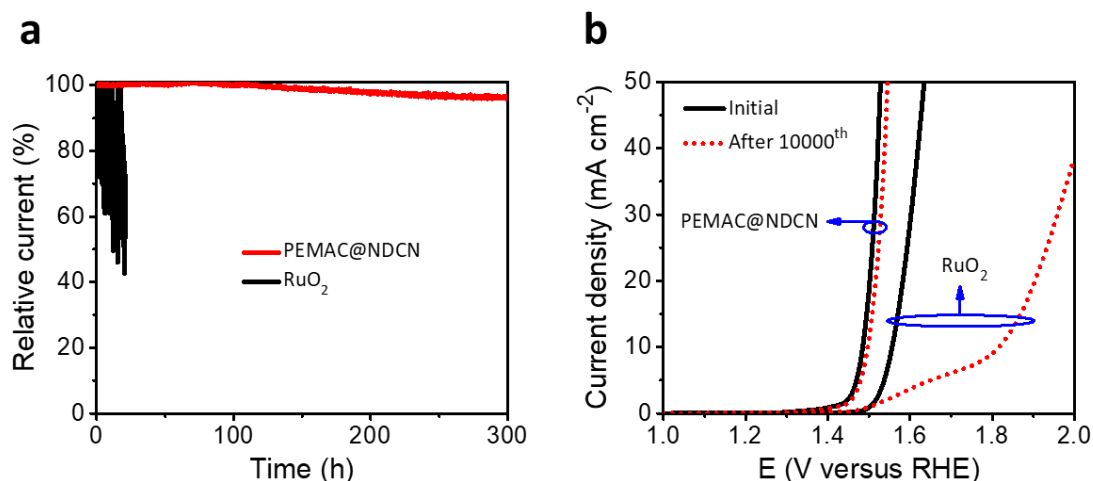

**Fig. S10** Electrochemical stability testing for OER. (a) Chronopotentiometric polarizations obtained for PEMAC@NDCN compared to those of commercial  $\text{RuO}_2$  at the respective overpotential. (b) LSV profiles for cycling operations (initial and after 10000<sup>th</sup>) for PEMAC@NDCN and  $\text{RuO}_2$

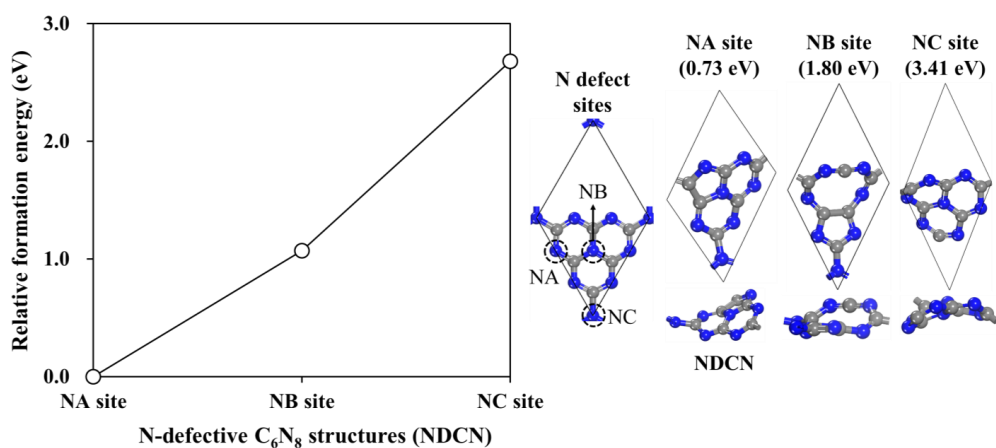

**Fig. S11** Possible single N-defective  $C_6N_8$  structures as N deficient  $C_3N_4$  structure considering three different corner (NA), center (NB), and bridge (NC) N defect sites in  $C_3N_4$  structure and formation energies,  $E_f$ , of them. NA-defective  $C_6N_8$  structure is denoted as “NDCN”

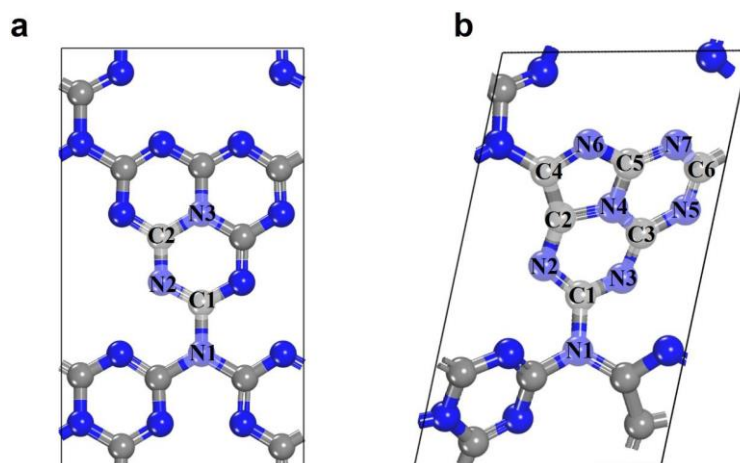

**Fig. S12** Optimized structures of (a) Bulk CN and (b) NDCN. The insets represent active sites with element symbols and Arabic numbers

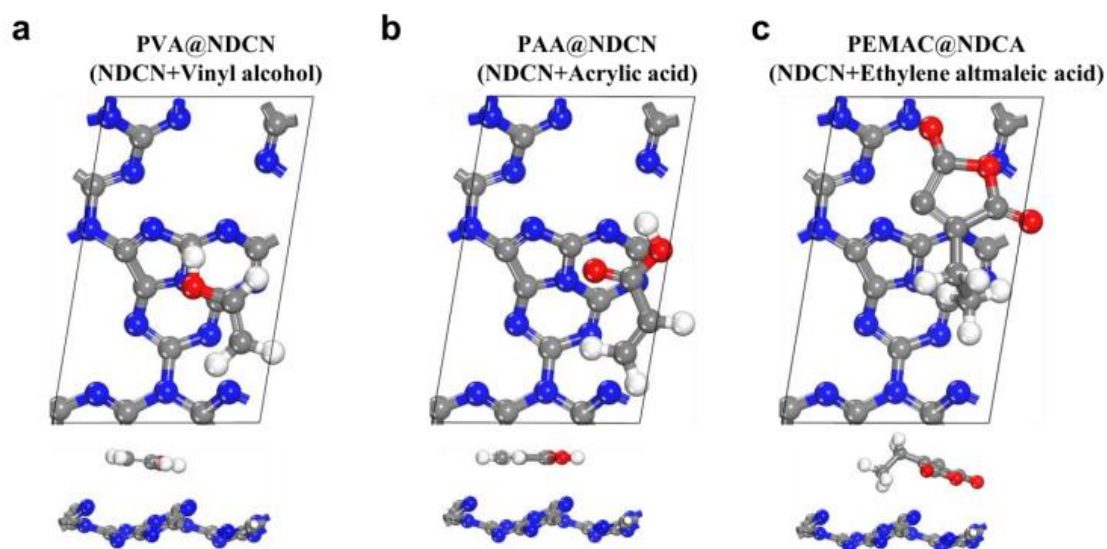

**Fig. S13** Polymer-assisted NDCN model structures of (a) PVA@NDCN, (b) PAA@NDCN, and PEMAC@NDCN using polymer units



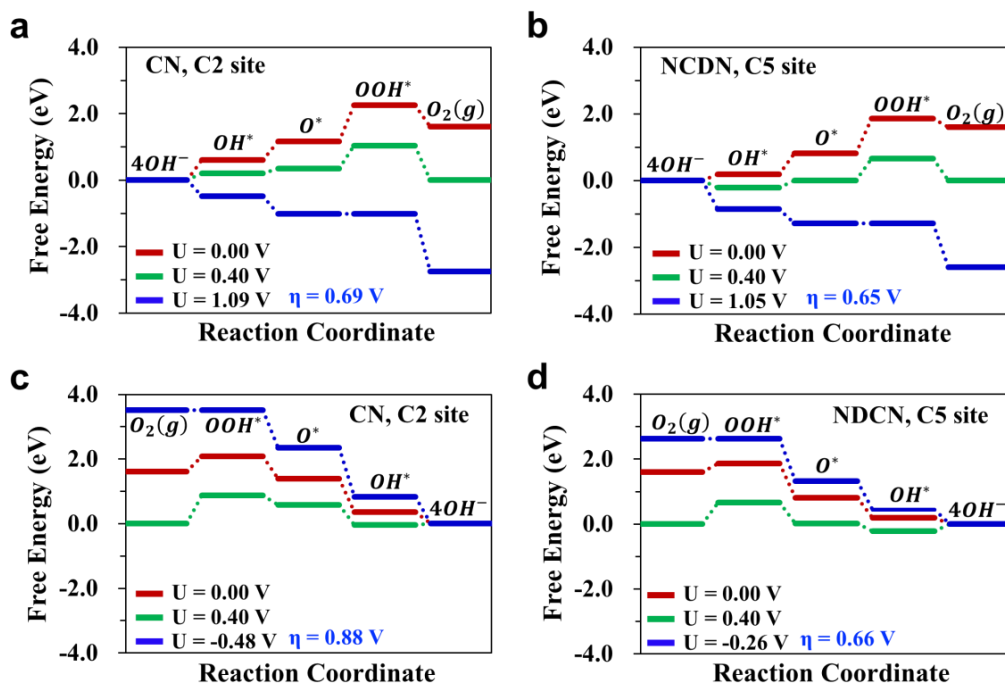

**Fig. S14** (a, b) OER and (c, d) ORR free energy diagrams on bulk CN and NDCN in an alkaline environment

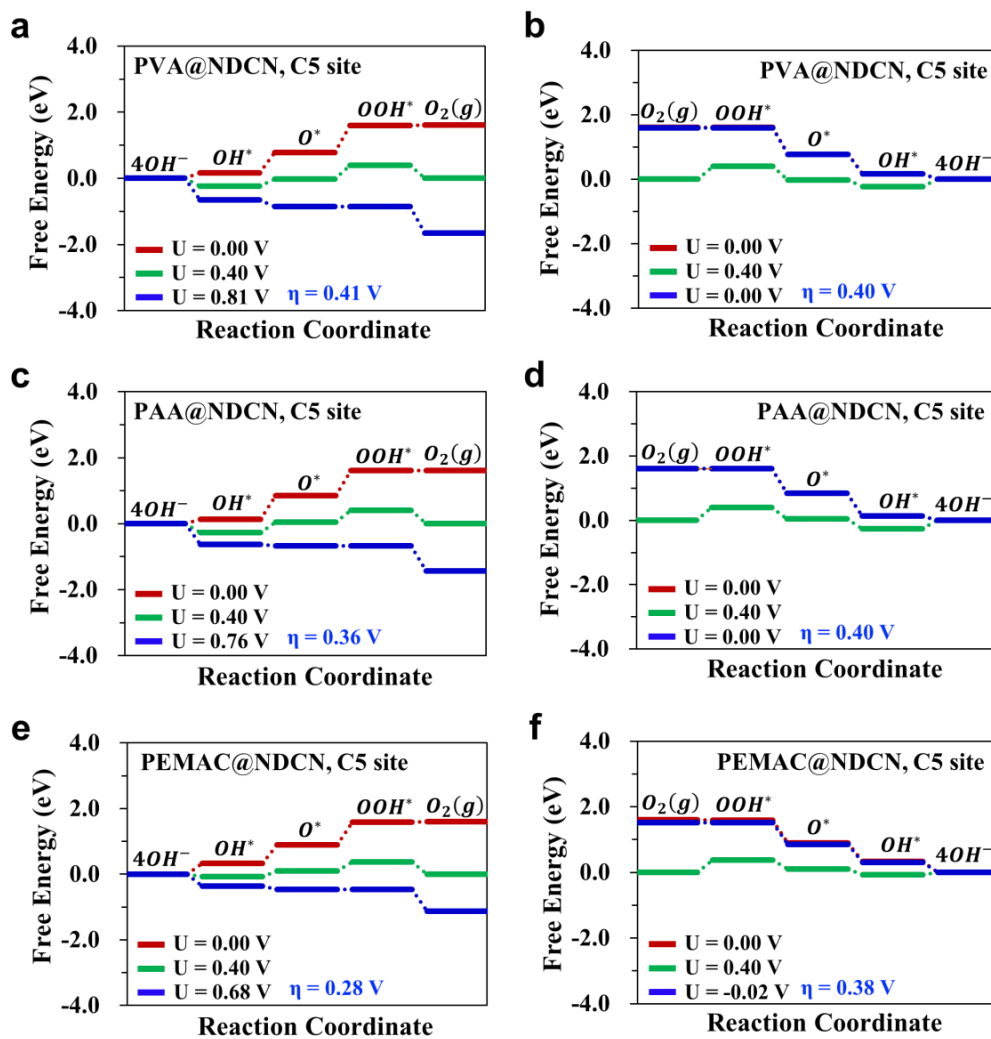

**Fig. S15** OER and ORR free energy diagrams on (a, b) PVA@NDCN, (c, d) PAA@NDCN, and (e, f) PEMAC@NDCN in an alkaline environment

We performed a detailed analysis of the OER/ORR overpotentials ( $\eta^{\text{OER/ORR}}$ ) by constructing free energy diagrams (FEDs) under different electrode potentials ( $U=0$  V, 0.402 V and  $\eta$  V) (Supporting Information Equation S6-S21). From the FEDs for bulk CN, NDCN and polymer-assisted NDCN structures in Figs. S14 and S15, we can deduce the  $\eta^{\text{OER/ORR}}$  corresponding to the largest endothermic reaction Gibbs free energy change ( $\Delta G$ ) under the equilibrium potential ( $U=0.402$  V in alkaline media), denoted by green lines in Figs. S14-S15. Applying an additional  $\eta^{\text{OER/ORR}}$  to overcome the potential-determining step ( $G^{\text{OER/ORR}}$ ), we can finally get an overall downhill reaction represented by blue lines in FEDs. The calculated results reveal that the PEMAC@NDCN has the lowest overpotentials ( $\eta^{\text{OER/ORR}}$ ) of 0.28 and 0.38 V, respectively. In addition, these values represent much better catalytic activities for conventional Pt (0.45 V) and RuO<sub>2</sub> (0.42 V).

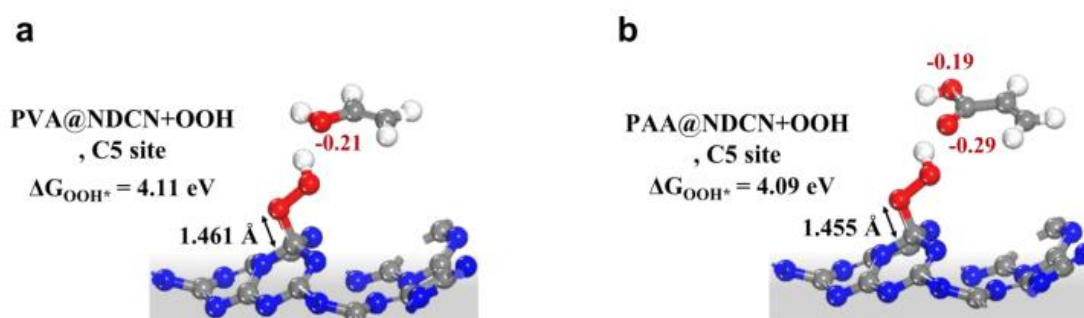

**Fig. S16** The optimized structures of (a) PVA@NDCN and (b) PAA@NDCN with OOH\* intermediate at the C5 active site

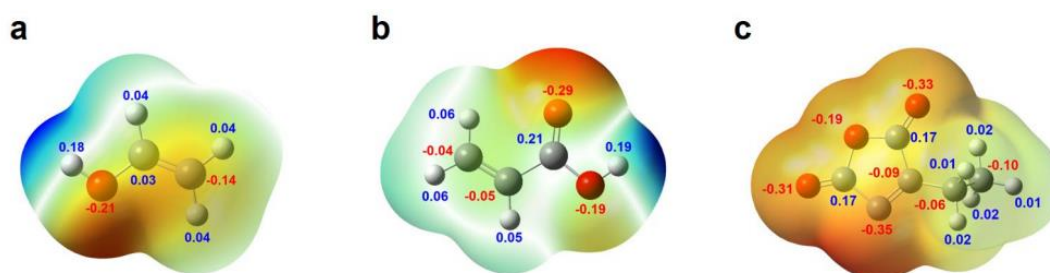

**Fig. S17** Charge distribution of vinyl alcohol (VA), acrylic alcohol (AA) and ethylene-alt-maleic acid (EMA) monomers

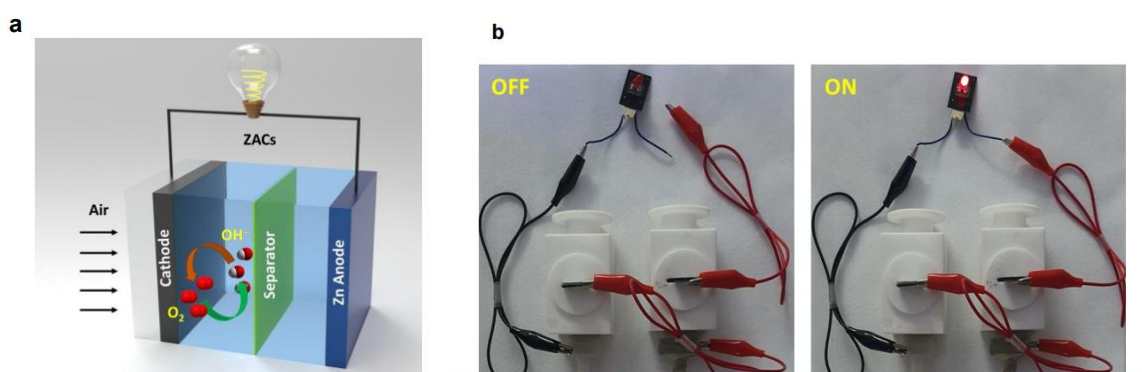

**Fig. S18** Cell fabrication. (a) Design illustration for the rechargeable alkaline zinc air batteries. (b) Practical demonstration of assembled home-made liquid ZABs with red LED illumination

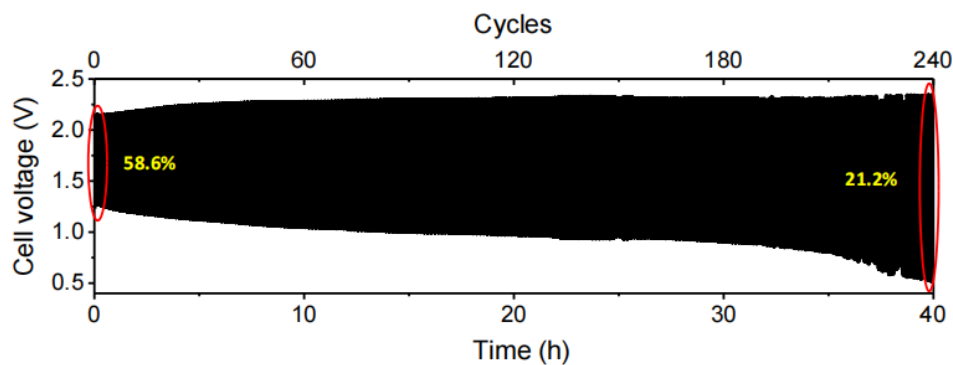

**Fig. S19** Electrochemical performance for alkaline ZABs. Long-term cycle operations for discharge and charge states for Pt/C + RuO<sub>2</sub> based ZABs. (Conditions: Current density = 20 mA cm<sup>-2</sup>, electrolyte = 6 M KOH + 0.2 M Zn acetate)

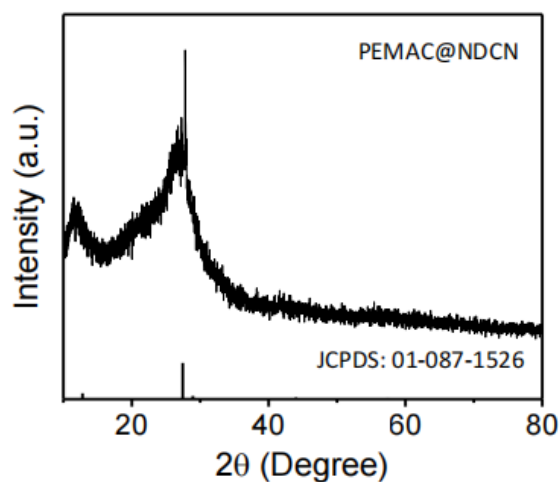

**Fig. S20** Post spectroscopic characterizations of cathodes for alkaline ZABs. XRD patterns for PEMAC@NDCN over 2160 discharge and charge cycles. (see Fig. 8)

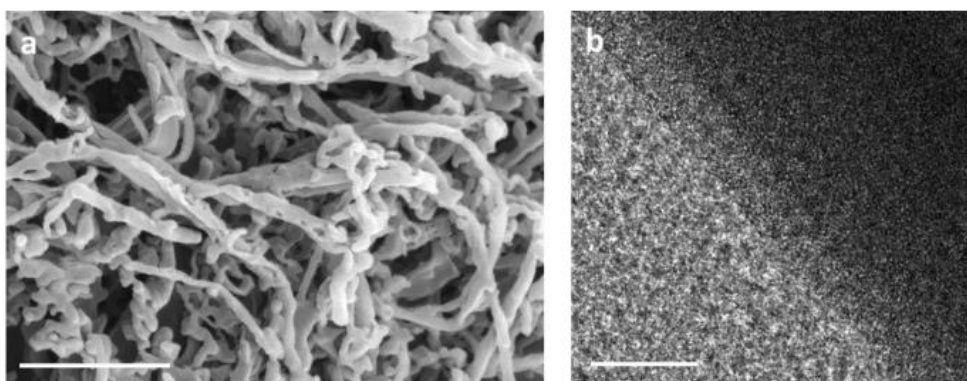

**Fig. S21** Post spectroscopic characterizations of cathodes for alkaline ZABs. (a) SEM image for PEMAC@NDCN over 2100 discharge and charge cycles. (b) HRTEM image for PEMAC@NDCN over 2160 discharge and charge cycles. Scale 500 nm (a) and 3 nm (b). (see Fig. 8)

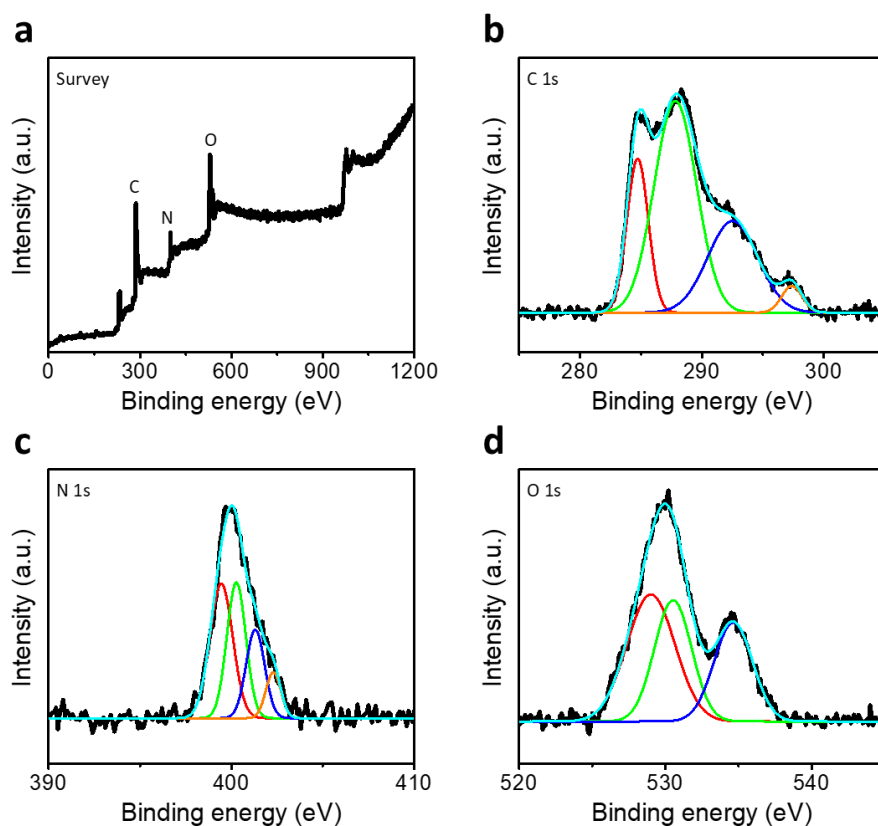

**Fig. S22** Post spectroscopic characterizations of cathodes for alkaline ZABs. XPS spectra for PEMAC@NDCN over 2160 discharge and charge cycles. (a) Full scan, (b) C 1s, (c) N 1s, and (d) O 1s. (see Fig. 8)

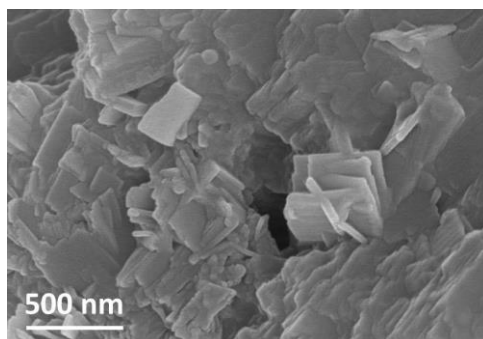

**Fig. S23** Post microscopic characterization of Zn anode in alkaline ZABs. SEM image of utilized Zn anode after 2160 discharge and charge cycle operations. (see Fig. 8)

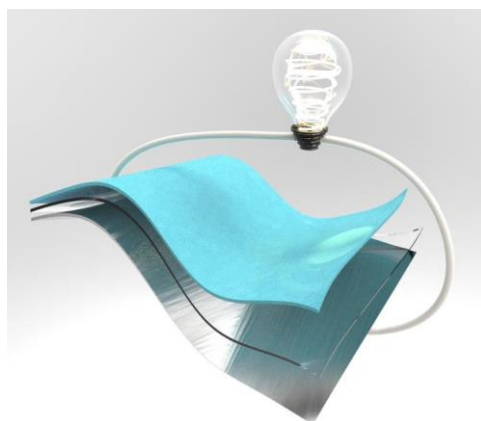

**Fig. S24** Fabrication of flexible solid-state ZABs. Design illustration for the rechargeable flexible solid-state zinc air batteries

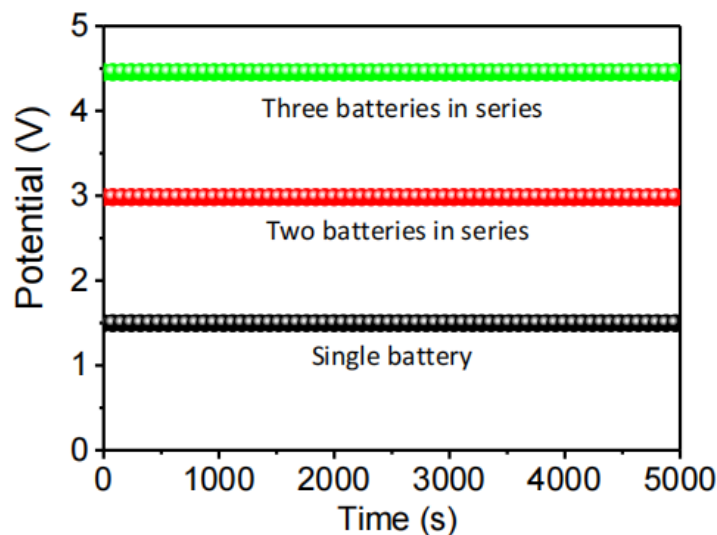

**Fig. S25** Electrochemical performance of flexible ZABs. Comparison of open-circuit potentials (OCPs) over designed PEMAC@NDCN // CBCs // Zn cells for serial connections of one, two, and three cells

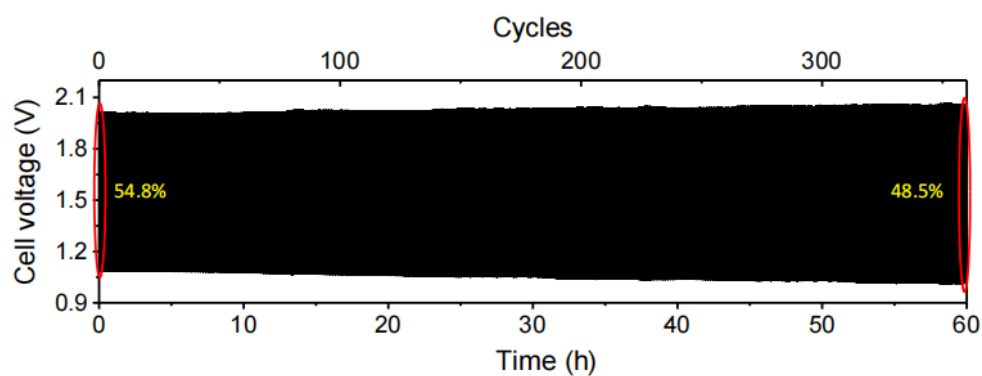

**Fig. S26** Electrochemical performance for flexible ZABs. Cycle life assessments for Pt/C + RuO<sub>2</sub> // CBCs // Zn cells for the current rate of 50 mA cm<sup>-2</sup> (Time: 10 min per cycle)

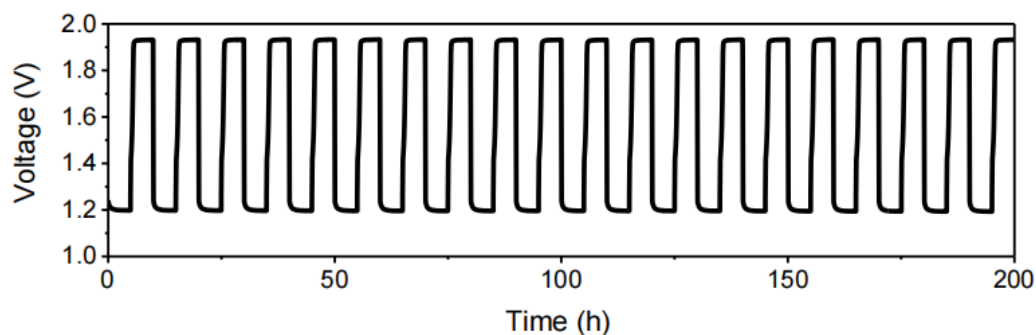

**Fig. S27** Electrochemical performance for flexible ZABs. Discharge and charge cycle operations of PEMAC@NDCN // CBCs // Zn for 10 h per cycle at 50 mA cm<sup>-2</sup>

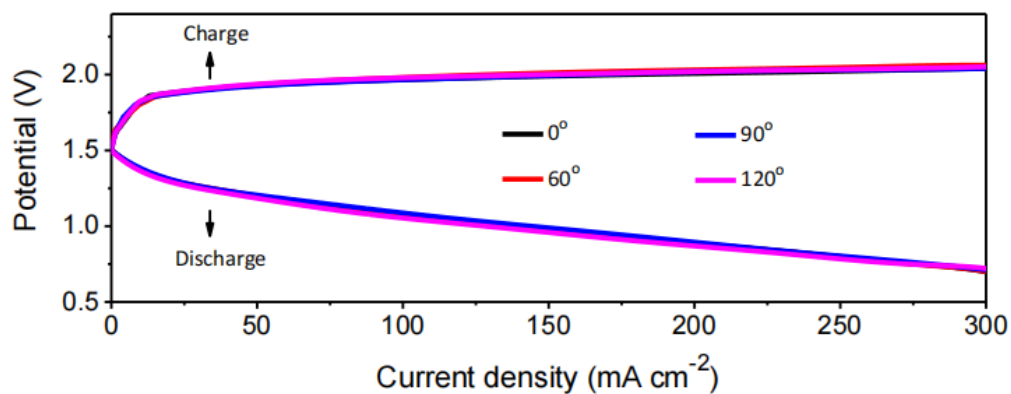

**Fig. S28** Electrochemical performance for flexible ZABs. Discharge and charge mechanical bent testing (0°, 60°, 120°, and 180°) for PEMAC@NDCN // CBCs // Zn cells

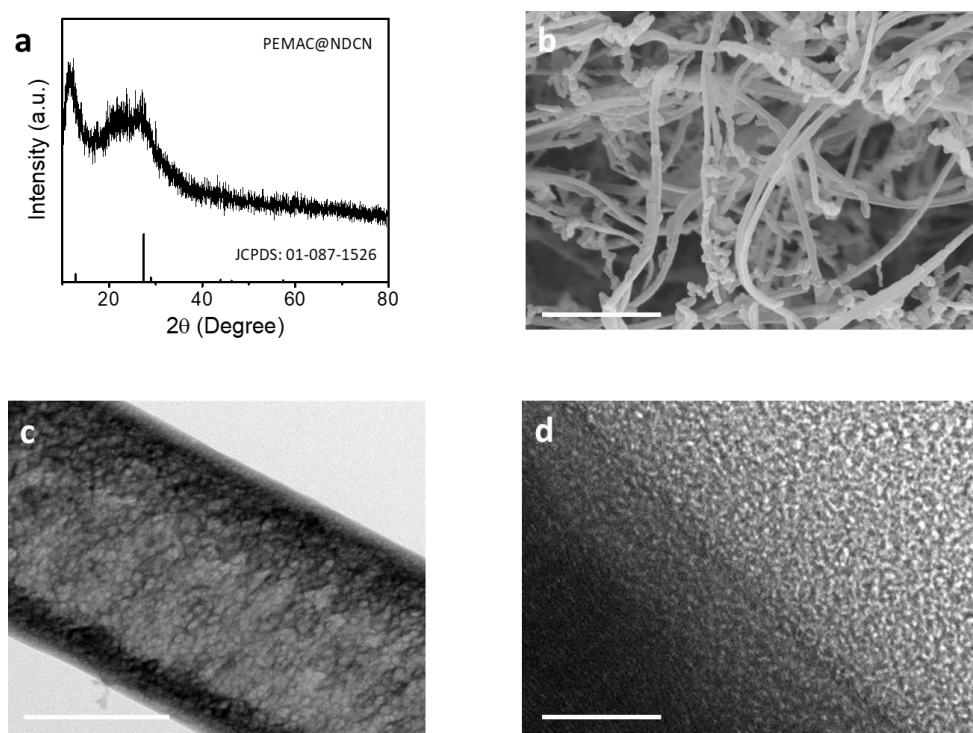

**Fig. S29** Post spectroscopic characterizations of PEMAC@NDCN for flexible ZABs. (a) XRD pattern, (b) SEM image, (c) STEM image, and (d) HRTEM image for PEMAC@NDCN cathode after 2580 discharge-charge cycle operations (refer Fig. 9). Scale bars, 500 nm (b), 50 nm (c), and 3 nm (d)

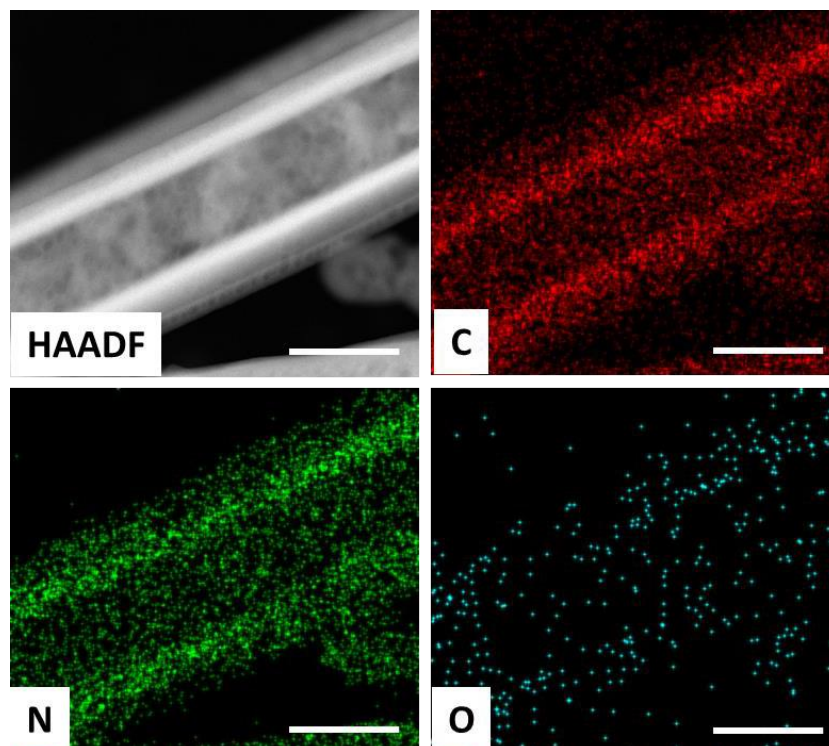

**Fig. S30** Post elemental visualizations of PEMAC@NDCN for flexible ZABs. HAADF image and elemental maps for PEMAC@NDCN after 2580 discharge-charge cycle operations (refer to Fig. 9). Scale 50 nm (a)

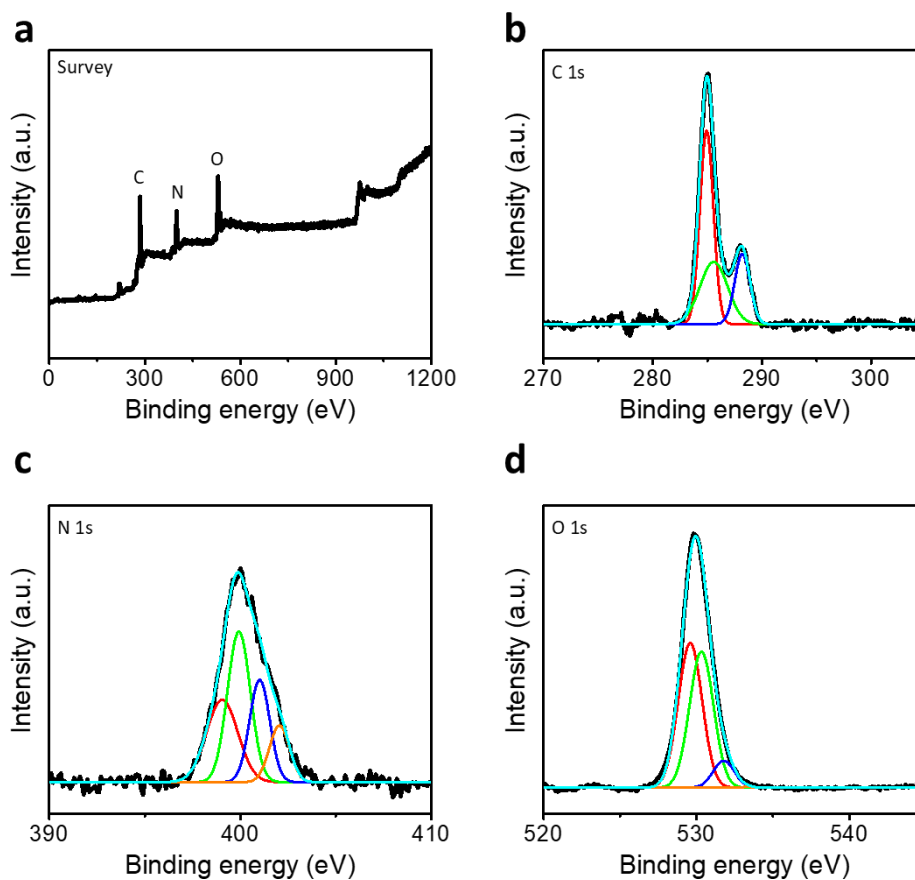

**Fig. S31** Post spectroscopic characterizations of PEMAC@NDCN for flexible ZABs. XPS spectra for PEMAC@NDCN after 2580 discharge and charge cycle operations. (a) Full scan, (b) C 1s, (c) N 1s, and (d) O 1s (Fig. 9)

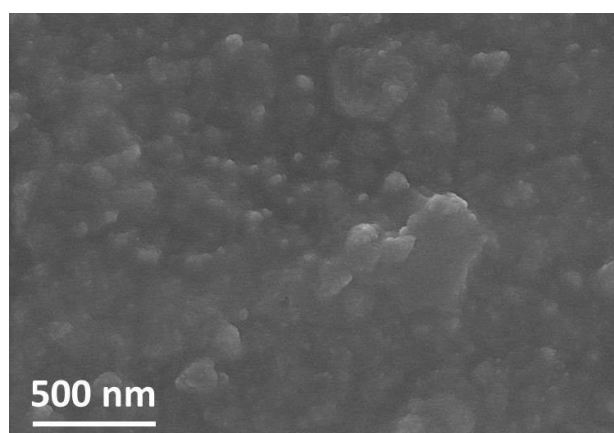

**Fig. S32** Post microscopic characterization of Zn anode in flexible ZABs. SEM image of utilized Zn anode after 2580 discharge and charge cycle operations (Fig. 9)

### S3 Supplementary Tables

**Table S1** Quantitative elemental statistics for PVA@NDCN, PAA@NDCN, PEMAC@NDCN compared to NDCN and bulk CN catalysts using XPS and EDS characterizations

| Sample     | C (at%) <sup>a</sup> | N (at%) <sup>a</sup> | O (at%) <sup>a</sup> | C (at%) <sup>b</sup> | N (at%) <sup>b</sup> | O (at%) <sup>b</sup> |
|------------|----------------------|----------------------|----------------------|----------------------|----------------------|----------------------|
| Bulk CN    | 42.13                | 56.09                | 1.78                 | 42.19                | 55.92                | 1.89                 |
| NDCN       | 52.68                | 44.23                | 3.09                 | 52.83                | 44.01                | 3.16                 |
| PVA@NDCN   | 59.2                 | 33.69                | 7.11                 | 59.23                | 33.71                | 7.06                 |
| PAA@NDCN   | 58.78                | 34.05                | 7.17                 | 58.75                | 33.99                | 7.26                 |
| PEMAC@NDCN | 58.9                 | 33.24                | 7.86                 | 59.13                | 33.18                | 7.69                 |

Note the “a” and “b” represents the XPS and EDS results

**Table S2** Quantitate estimation of nitrogen species: pyridinic (N1), pyrrolic N (N2), graphitic (N3), quaternary (N4), and oxidized N (N5) for the fabricated polymeric catalysts

| Sample     | N1     | N2     | N3     | N4     | N5     |
|------------|--------|--------|--------|--------|--------|
| Bulk CN    | -      | 399.42 | 400.95 | -      | -      |
| NDCN       | -      | 399.38 | 400.12 | 401.52 | -      |
| PVA@NDCN   | -      | 399.5  | 400.30 | 401.39 | 402.41 |
| PAA@NDCN   | -      | 399.41 | 400.12 | 401.17 | 402.40 |
| PEMAC@NDCN | 398.81 | 399.59 | 400.43 | 401.61 | 402.62 |



**Table S3** Influence of polymer to N deficient carbon nitride ratio over electrochemical performances

| <b>Polymer content (%)</b> | <b>Overall oxygen bifunctional activity E (V)</b> |
|----------------------------|---------------------------------------------------|
| 0                          | 0.93                                              |
| 1                          | 0.91                                              |
| 3                          | 0.79                                              |
| 5                          | 0.61                                              |
| 7                          | 0.66                                              |
| 10                         | 0.86                                              |
| 20                         | 1.06                                              |

**Table S4** Comparison for bifunctional ORR and OER performance for the fabricated polymeric and previously reported champion catalysts

| Catalyst                                       | Loading<br>(mg cm <sup>-2</sup> ) | ORR onset<br>potential<br>(V vs. RHE) | ORR Tafel<br>slope<br>(mV dec <sup>-1</sup> ) | ORR<br>half-wave<br>potential ( $E_{1/2}$ )<br>(V vs. RHE) | OER onset<br>potential<br>(V vs. RHE) | OER Tafel<br>slope<br>(mV dec <sup>-1</sup> ) | OER potential<br>@ 10 mA cm <sup>-2</sup> ( $E_{j=10}$ )<br>(V vs. RHE) | Overall oxygen<br>electrode activity<br>$E (E_{j=10} - E_{1/2})$<br>(V) | Refs.     |
|------------------------------------------------|-----------------------------------|---------------------------------------|-----------------------------------------------|------------------------------------------------------------|---------------------------------------|-----------------------------------------------|-------------------------------------------------------------------------|-------------------------------------------------------------------------|-----------|
| PEMAC@NDCN                                     | 0.15                              | -                                     | 42                                            | 0.87                                                       | -                                     | 48                                            | 1.48                                                                    | 0.61                                                                    | This work |
| Mn/Fe-HIB-MOF                                  | 0.15                              | 0.98                                  | 36                                            | 0.883                                                      | 1.33                                  | 45                                            | 1.51                                                                    | 0.63                                                                    | [S10]     |
| Fe/SNCFs-NH <sub>3</sub>                       | -                                 | -                                     | 70.82                                         | 0.89                                                       | -                                     | -                                             | 1.78                                                                    | 0.89                                                                    | [S11]     |
| CPS(101)                                       | 0.1                               | 0.99                                  | 39                                            | 0.90                                                       | 1.38                                  | 58                                            | 1.49                                                                    | 0.59                                                                    | [S12]     |
| FeCo SAs@Co/N-GC                               | 0.25                              | 0.98                                  | 49                                            | 0.88                                                       | 1.44                                  | 56.6                                          | 1.52                                                                    | 0.64                                                                    | [S13]     |
| Ir@Co <sub>3</sub> O <sub>4</sub> <sup>a</sup> | 0.5                               | -                                     | -                                             | 0.75                                                       | -                                     | -                                             | 1.51                                                                    | 0.76                                                                    | [S14]     |
| Ni SAs-NC <sup>a</sup>                         | 0.1                               | -                                     | -                                             | 0.85                                                       | -                                     | 62                                            | 1.67                                                                    | 0.82                                                                    | [S15]     |
| Co-FPOH <sup>a</sup>                           | 0.283                             | 0.82                                  | 183                                           | 0.69                                                       | -                                     | 63                                            | 1.52                                                                    | 0.83                                                                    | [S16]     |
| Co@IC/MoC@PC                                   | 0.4                               | -                                     | 78                                            | 0.875                                                      | -                                     | 82                                            | 1.51                                                                    | 0.635                                                                   | [S17]     |
| Nitride/N-Ti <sub>3</sub> C <sub>2</sub>       | 1.0                               | 0.95                                  | -                                             | 0.84                                                       | 1.48                                  | 72                                            | 1.53                                                                    | 0.69                                                                    | [S18]     |
| IOSHs-NSC-Co <sub>9</sub> S <sub>8</sub>       | 1                                 | -                                     | -                                             | 0.82                                                       | -                                     | 101                                           | 1.64                                                                    | 0.82                                                                    | [S19]     |
| NPMC-1000                                      | 0.10                              | 0.94                                  | -                                             | 0.85                                                       | 1.30                                  | -                                             | -                                                                       | -                                                                       | [S20]     |
| NiO/CoN PINWs                                  | 0.20                              | 0.89                                  | 35                                            | 0.68                                                       | 1.53                                  | -                                             | 1.53                                                                    | 0.85                                                                    | [S21]     |
| PS-CNS                                         | 0.15                              | 0.97                                  | 61                                            | 0.87                                                       | 1.26                                  | 64                                            | 1.56                                                                    | 0.69                                                                    | [S22]     |
| Co <sub>4</sub> N/CNW/CC                       | 0.20                              | 0.89                                  | -                                             | 0.80                                                       | 1.50                                  | 81                                            | 1.54                                                                    | 0.74                                                                    | [S23]     |
| CCO@C                                          | 0.2                               | 0.95                                  | -                                             | 0.86                                                       | 1.47                                  | 74                                            | 1.56                                                                    | 0.70                                                                    | [S24]     |
| 1100-CNS                                       | 0.42                              | 0.99                                  | 58                                            | 0.88                                                       | 1.50                                  | 292                                           | 1.69                                                                    | 0.81                                                                    | [S25]     |

|                                         |      |       |       |       |      |      |       |       |       |
|-----------------------------------------|------|-------|-------|-------|------|------|-------|-------|-------|
| C-MOF-C2-900                            | 0.5  | 0.92  | -     | 0.817 | 1.50 | 79   | 1.58  | 0.763 | [S26] |
| Co-N,B-CSs                              | 0.1  | 0.89  | 64    | 0.83  | 1.42 | -    | 1.66  | 0.83  | [S27] |
| S-C2NA                                  | 0.15 | 0.98  | 54    | 0.88  | 1.28 | 62   | 1.53  | 0.65  | [S28] |
| FeN <sub>x</sub> -PNC                   | 0.14 | 0.99  | -     | 0.86  | 1.56 | 80   | 1.63  | 0.77  | [S29] |
| CFZr(0.3)/N-rGO                         | 0.3  | 0.85  | -     | 0.76  | 1.4  | -    | 1.6   | 0.84  | [S30] |
| NDGs-800                                | 0.2  | 0.98  | 81    | 0.85  | 1.5  | 132  | 1.68  | 0.83  | [S31] |
| CMO/S-300                               | 0.3  | 0.915 | 52    | 0.76  | 1.5  | -    | 1.70  | 0.94  | [S32] |
| Co/Co <sub>3</sub> O <sub>4</sub> @PGS  | 0.3  | 0.97  | 52.6  | 0.89  | 1.52 | 76.1 | 1.58  | 0.69  | [S33] |
| DN-CP@G                                 | 0.2  | 0.95  | -     | 0.801 | 1.5  | 65   | 1.788 | 0.987 | [S34] |
| N-GRW                                   | 0.30 | 0.92  | 53    | 0.84  | 1.53 | 47   | 1.59  | 0.75  | [S35] |
| NCNF-1000                               | 0.10 | 0.94  |       | 0.85  | 1.30 |      | 1.84  | 1.02  | [S36] |
| NiCo <sub>2</sub> S <sub>4</sub> /N-CNT | 0.25 | 0.93  | -     | 0.80  | -    | -    | 1.60  | 0.80  | [S37] |
| NC-Co <sub>3</sub> O <sub>4</sub> -90   | 1.2  | 0.91  | -     | 0.87  | -    | -    | 1.59  | 0.72  | [S38] |
| FeNi@N-GR                               | 0.2  | 0.94  | -     | 0.83  | 1.38 | 62   | 1.44  | 0.61  | [S39] |
| PS-CNF                                  | 0.2  | 0.95  | 29    | 0.86  | 1.32 | 89   | 1.55  | 0.69  | [S40] |
| S,N-Fe/N/C-CNT                          | 0.25 | 0.94  | -     | 0.84  | 1.45 | 82   | 1.60  | 0.76  | [S41] |
| Co <sub>3</sub> O <sub>4</sub> /NPGC    | 0.20 | 0.97  | -     | 0.84  | 1.45 | -    | 1.68  | 0.84  | [S42] |
| PCN-CFP                                 | 0.20 | 0.94  | 122.3 | 0.67  | 1.53 | 61.6 | 1.63  | 0.96  | [S43] |
| N-GCNT/FeCo-3                           | 0.40 | 1.03  | 66.8  | 0.92  | 1.42 | 99.5 | 1.73  | 0.81  | [S44] |
| CoO/N-G                                 | 0.70 | 0.90  | 48    | 0.81  | 1.30 | 71   | 1.57  | 0.76  | [S45] |
| S-GNS/NiCo <sub>2</sub> S <sub>4</sub>  | 0.3  | 0.93  | -     | 0.88  | 1.48 | 65   | 1.56  | 0.69  | [S46] |

**Table S5** Comparison over electrochemical performances of primary ZABs under in alkaline electrolytes for previously reported champion materials

| Catalyst                                 | OCP (V) | Power density (mW cm <sup>-2</sup> ) | Specific capacity (mAh g <sup>-1</sup> ) | Energy density (Wh kg <sup>-1</sup> ) | Durability (h) | Refs.     |
|------------------------------------------|---------|--------------------------------------|------------------------------------------|---------------------------------------|----------------|-----------|
| PEMAC@NDCN                               | 1.51    | 214                                  | 817                                      | 1070                                  | -              | This work |
| Pt/C +RuO <sub>2</sub>                   | 1.5     | 178                                  | 773                                      | 966                                   | -              | This work |
| Mn/Fe-HIB-MOFs                           | 1.50    | 195                                  | 768                                      | 1027                                  | -              | [S10]     |
| Fe/SNCFs-NH <sub>3</sub>                 | -       | 255                                  | -                                        | -                                     | -              | [S11]     |
| FeCo SAs@Co/N-GC                         | -       | 207                                  | 741                                      | 934                                   | -              | [S13]     |
| Co-FPOH                                  | -       | 167.8                                | 817                                      | 980                                   | -              | [S16]     |
| Co@IC/MoC@PC                             | -       | 221                                  | 728                                      | -                                     | -              | [S17]     |
| Nitride/N-Ti <sub>3</sub> C <sub>2</sub> | -       | 27                                   | 630                                      | 756                                   | -              | [S18]     |
| PFN PF                                   | -       | 175                                  | 816                                      | 938                                   | -              | [S47]     |
| Co <sub>9</sub> S <sub>8</sub> @N,S-C    | -       | 259                                  | 862                                      | -                                     | -              | [S48]     |
| FeCo/Se-CNT                              | -       | 175                                  | 750                                      | 894                                   | -              | [S49]     |
| Co-TMPyP/CCG                             | -       | 225                                  | 793                                      | -                                     | -              | [S50]     |
| NPMC-1000                                | 1.48    | 55                                   | 735                                      | -                                     | 240 (~1.3 V)   | [S20]     |
| NiO/CoN PINWs                            | 1.46    | 79.6                                 | 690                                      | 945                                   | -              | [S21]     |
| P,S-CNS                                  | 1.51    | 198                                  | 830                                      | -                                     | 210 (~1.3 V)   | [S22]     |

**Table S6** Comparison over cycle life assessment of rechargeable ZABs in the alkaline electrolyte

| Catalyst                                 | Rechargeability                                            | Refs.     |
|------------------------------------------|------------------------------------------------------------|-----------|
| PEMAC@NDCN                               | 600 s/cycle for 2160 cycles; 360 h@20 mA cm <sup>-2</sup>  | This work |
| Mn/Fe-HIB-MOFs                           | 600 s/cycle for 6000 cycles; 1000 h@10 mA cm <sup>-2</sup> | [S10]     |
| Fe/SNCFs-NH <sub>3</sub>                 | 3600 s/cycle for 1000 cycles; 1000 h@1 mA cm <sup>-2</sup> | [S11]     |
| FeCo SAs@Co/N-GC                         | 600 s/cycle for 1200 cycles; 200 h@10 mA cm <sup>-2</sup>  | [S13]     |
| Ir@Co <sub>3</sub> O <sub>4</sub>        | 1200 s/cycle for 720 cycles; 240 h@10 mA cm <sup>-2</sup>  | [S14]     |
| Co-FPOH                                  | 600 s/cycle for 1200 cycles; 450 h@5 mA cm <sup>-2</sup>   | [S16]     |
| Co@IC/MoC@PC                             | 1200 s/cycle for 300 cycles; 100 h@1 mA cm <sup>-2</sup>   | [S17]     |
| Nitride/N-Ti <sub>3</sub> C <sub>2</sub> | 3600 s/cycle for 120 cycles; 120 h@20 mA cm <sup>-2</sup>  | [S18]     |
| PFN PF                                   | 1800 s/cycle for 1000 cycles; 500 h@20 mA cm <sup>-2</sup> | [S47]     |
| Co <sub>9</sub> S <sub>8</sub> @N,S-C    | 720 s/cycle for 660 cycles; 110 h@1 mA cm <sup>-2</sup>    | [S48]     |
| FeCo/Se-CNT                              | 1200 s/cycle for 210 cycles; 70 h@5 mA cm <sup>-2</sup>    | [S49]     |
| Co-TMPyP/CCG                             | 1200 s/cycle for 300 cycles; 100 h@2 mA cm <sup>-2</sup>   | [S50]     |
| NPMC-1000                                | 600 s/cycle for 600 cycles; 100 h@2 mA cm <sup>-2</sup>    | [S20]     |
| NiO/CoN PINWs                            | 600 s/cycle for 25 cycles; 8.3 h@50 mA cm <sup>-2</sup>    | [S21]     |
| P,S-CNS                                  | 720 s/cycle for 500 cycles; 100 h@2 mA cm <sup>-2</sup>    | [S22]     |
| Co <sub>4</sub> N/CNW/CC                 | 1200 s/cycle for 408 cycles; 136 h@10 mA cm <sup>-2</sup>  | [S23]     |
| CCO@C                                    | 1800 s/cycle for 160 cycles; 80 h @2 mA cm <sup>-2</sup>   | [S24]     |
| 1100-CNS                                 | 660 s/cycle for 300 cycles; 55 h @10 mA cm <sup>-2</sup>   | [S25]     |
| C-MOF-C2-900                             | 1200 s/cycle for 360 cycles; 120 h @2 mA cm <sup>-2</sup>  | [S26]     |

Nano-Micro Letters

|                                               |                                                            |       |
|-----------------------------------------------|------------------------------------------------------------|-------|
| Co-N,B-CSs                                    | 394 s/cycle for 128 cycles; 14 h @5 mA cm <sup>-2</sup>    | [S27] |
| S-C <sub>2</sub> NA                           | 2 h/cycle for 375 cycles; 750 h@10 mA cm <sup>-2</sup>     | [S28] |
| FeN <sub>x</sub> -PNC                         | 660 s/cycle for 220 cycles; 40 h @5 mA cm <sup>-2</sup>    | [S29] |
| CFZr(0.3)/N-rGO                               | 3600 s/cycle for 11 cycles; 11 h @15 mA cm <sup>-2</sup>   | [S30] |
| NDGs-800                                      | 1200 s/cycle for 234 cycles; 78 h @10 mA cm <sup>-2</sup>  | [S31] |
| CMO/S-300                                     | 400 s/cycle for 120 cycles; 13 h @5 mA cm <sup>-2</sup>    | [S32] |
| Co/Co <sub>3</sub> O <sub>4</sub> @PGS        | 600 s/cycle for 4800 cycles; 800 h @10 mA cm <sup>-2</sup> | [S33] |
| DN-CP@G                                       | 3600 s/cycle for 250 cycles; 250 h @5 mA cm <sup>-2</sup>  | [S34] |
| N-GRW                                         | 1h/cycle for 160 cycles; 160 h@2 mA cm <sup>-2</sup>       | [S35] |
| NCNF-1000                                     | 600 s/cycle for 500 cycles; 83 h@10 mA cm <sup>-2</sup>    | [S36] |
| NiCo <sub>2</sub> S <sub>4</sub> /N-CNT       | 400 s/cycle for 150 cycles; 17 h@10 mA cm <sup>-2</sup>    | [S37] |
| NC-Co <sub>3</sub> O <sub>4</sub> -90         | 1200 s/cycle for 600 cycles; 200 h@10 mA cm <sup>-2</sup>  | [S38] |
| FeNi@N-GR                                     | 1200 s/cycle for 120 cycles; 40 h @20 mA cm <sup>-2</sup>  | [S39] |
| PS-CNF                                        | 700 s/cycle for 600 cycles; 120 h @2 mA cm <sup>-2</sup>   | [S40] |
| Co <sub>3</sub> O <sub>4</sub> /NPGC          | 1200 s/cycle for 250 cycles; 83 h@5 mA cm <sup>-2</sup>    | [S42] |
| PCN-CFP                                       | 600 s/cycle for 50 cycles; 8.3 h@20 mA cm <sup>-2</sup>    | [S43] |
| N-GCNT/FeCo-3                                 | 600 s/cycle for 240 cycles; 40 h@125 mA cm <sup>-2</sup>   | [S44] |
| S-GNS/NiCo <sub>2</sub> S <sub>4</sub>        | 2400 s/cycle for 150 cycles; 100 h @10 mA cm <sup>-2</sup> | [S51] |
| CNT@POF                                       | 1200 s/cycle for 200 cycles; 67 h @2 mA cm <sup>-2</sup>   | [S52] |
| CoO/N-CNT + NiFe<br>LDH/Ni                    | 10 h/cycle for 10 cycles; 200 h@20 mA cm <sup>-2</sup>     | [S57] |
| CuS/NiS <sub>2</sub>                          | 1800 s/cycle for 500 cycles; 83 h @25 mA cm <sup>-2</sup>  | [S60] |
| macro/meso-NC-NH <sub>3</sub> +<br>COMT@Ni    | 4 h/cycle for 200 cycles; 800 h@10 mA cm <sup>-2</sup>     | [S61] |
| Co <sub>3</sub> O <sub>4</sub> NWs            | 600 s/cycle for 100 cycles; 17 h@50 mA cm <sup>-2</sup>    | [S62] |
| NCNT/CoO-NiO-NiCo                             | 600 s/cycle for 100 cycles; 17 h@20 mA cm <sup>-2</sup>    | [S63] |
| LBSCFO-50                                     | 600 s/cycle for 100 cycles; 17 h@10 mA cm <sup>-2</sup>    | [S64] |
| Ni <sub>6/7</sub> Fe <sub>1/7</sub> -OH-6/CNT | 600 s/cycle for 150 cycles; 25 h@15 mA cm <sup>-2</sup>    | [S65] |
| NiCo/PFC                                      | 2 h/cycle for 300 cycles; 600 h@10 mA cm <sup>-2</sup>     | [S66] |
| Ni <sub>3</sub> Fe/N-C                        | 4 h/cycle for 105 cycles; 420 h@10 mA cm <sup>-2</sup>     | [S67] |
| NiO/Ni(OH) <sub>2</sub>                       | 70 min/cycle for 70 cycles; 82 h@1 mA cm <sup>-2</sup>     | [S68] |
| Fe@NC                                         | 600 s/cycle for 100 cycles; 17 h@10 mA cm <sup>-2</sup>    | [S69] |
| BNC                                           | 600 s/cycle for 66 cycles; 11 h@20 mA cm <sup>-2</sup>     | [S70] |
| c-CoMn <sub>2</sub> /C                        | 400 s/cycle for 155 cycles; 17 h@10 mA cm <sup>-2</sup>    | [S71] |
| CCBC-2                                        | 600 s/cycle for 75 cycles; 12.5 h@2 mA cm <sup>-2</sup>    | [S72] |
| RuSn <sub>73</sub>                            | 600 s/cycle for 100 cycles; 16.6 h@10 mA cm <sup>-2</sup>  | [S73] |
| α-MnO <sub>2</sub> /CNT <sub>10</sub>         | 300 s/cycle for 100 cycles; 8.33 h@10 mA cm <sup>-2</sup>  | [S74] |

**Table S7** Comparison over electrochemical performances of flexible ZABs with previously reported champion catalysts and electrolytes.

| Catalyst                                 | Electrolyte                                              | Power density (mW cm <sup>-2</sup> ) | Specific capacity (mAh g <sub>Zn</sub> <sup>-1</sup> ) | Energy density (Wh kg <sub>Zn</sub> <sup>-1</sup> ) | Recharge ability                         | Refs.     |
|------------------------------------------|----------------------------------------------------------|--------------------------------------|--------------------------------------------------------|-----------------------------------------------------|------------------------------------------|-----------|
| PEMAC@NDCN                               | CBCs                                                     | 211                                  | 806                                                    | 1056                                                | 10 min/cycle for 2580 cycles; 430 h@50   | This work |
| Mn/Fe-HIB-MOF                            | Functionalized Bio-cellulose membrane                    | 193                                  | 748                                                    | 975                                                 | 10 min/cycle for 3600 cycles; 600h@25    | [S10]     |
| FeCo SAs@Co/N-GC                         | Functionalized Bio-cellulose                             | 186                                  | 817                                                    | 1017                                                | 10 min/cycle for 684 cycles; 114 h@50    | [S13]     |
| CPS(101)                                 | CBCs                                                     | 458                                  | -                                                      | -                                                   | 8 min/cycle for 6000 cycles; 800 h@25    | [S12]     |
| Fe/SNCFs-NH <sub>3</sub>                 | (PANa)-KOH-Zn(CH <sub>3</sub> COO) <sub>2</sub> hydrogel | -                                    | -                                                      | -                                                   | 30 min/cycle for 120 cycles; 60 h@1      | [S11]     |
| FeCo/Se-CNT                              | PVA gel                                                  | 37.5                                 | -                                                      | -                                                   | 10 min/cycle for 120 cycles; 20 h@5      | [S49]     |
| Fe1/d-CN                                 | PVA gel                                                  | 78                                   | -                                                      | -                                                   | 20 min/cycle for 60                      | [S75]     |
| Nitride/N-Ti <sub>3</sub> C <sub>2</sub> | PVA gel                                                  | 27                                   | 630                                                    | 693                                                 | 60 min/cycle for 120 cycles; 120 h@20    | [S18]     |
| CuSA@HNCNx                               | Functionalized Bio-cellulose                             | 212                                  | 806                                                    | 1031                                                | 10 min/cycle for 1500 cycles; 250 h@ 25  | [S76]     |
| Co <sub>4</sub> N/CNW/CC                 | PVA gel                                                  | -                                    | -                                                      | -                                                   | 20 min/cycle for 36 cycles; 12 h         | [S23]     |
| Co-N,B-CSs                               | PVA gel                                                  | -                                    | -                                                      | -                                                   | 6 min/cycle for 230 cycles; 23 h@2       | [S27]     |
| S-C <sub>2</sub> NA                      | Functionalized Cellulose film                            | 187                                  | 695                                                    | 862                                                 | 30 min/cycle for 900 cycles; 450 h       | [S28]     |
| CMO/S-300                                | PVA gel                                                  | -                                    | -                                                      | -                                                   | 30 min/cycle for 20 cycles; 10 h@1       | [S32]     |
| DN-CP@G                                  | PVA gel                                                  | -                                    | 530                                                    | -                                                   | 60 min/cycle for 170 cycles; 170 h@1     | [S34]     |
| NCNF-1000                                | PVA gel                                                  | -                                    | 378                                                    | 378                                                 | 10 min/cycle for 48 cycles; 8 h@1        | [S36]     |
| NC-Co <sub>3</sub> O <sub>4</sub> -90    | Acrylic acid gel                                         | 82                                   | 387.2                                                  | 387.2                                               | 24 min/cycle for 60 cycles; 24 h@1       | [S38]     |
| FeNi@N-GR                                | PVA gel                                                  | -                                    | -                                                      | -                                                   | 20 min/cycle for 54 cycles; 18 h         | [S39]     |
| N-GCNT/FeCO-3                            | PVA gel                                                  | 97.8                                 | -                                                      | -                                                   | 10 min/cycle for 72 cycles; 12 h         | [S44]     |
| CNT@POF                                  | PVA gel                                                  | -                                    | -                                                      | -                                                   | 4 min/cycle for 12 cycles; 48 min        | [S52]     |
| CuS/NiS <sub>2</sub>                     | PVA gel                                                  | -                                    | -                                                      | -                                                   | 10 min/cycle for 150 cycles; 25 h        | [S60]     |
| Co <sub>3</sub> O <sub>4</sub> -NCNT/SS  | Cellulose film                                           | 162                                  | 652.6                                                  | 847.6                                               | 20 min/cycle for 1500 cycles; 500 h@25   | [S77]     |
| MnO <sub>x</sub> -GCC                    | Acrylic acid gel                                         | 32                                   | -                                                      | -                                                   | 20 min/cycle for 200 cycles; 66.66 h@0.7 | [S78]     |
| Co <sub>3</sub> O <sub>4</sub>           | Cellulose membrane                                       | -                                    | -                                                      | -                                                   | 1 h/cycle for 35 cycles; 35 h@250        | [S79]     |
| LaNiO <sub>3</sub> /NCNT                 | PVA gel                                                  | 56.1                                 | 460                                                    | 581                                                 | 20 min/cycle for 120 cycles; 40 h@50     | [S80]     |

**Table S8** Comparison of flexible ZABs performances over wide temperature with previously champion reports

| Catalyst                                  | Electrolyte | Lowest working temperature (°C) | Working temperature (°C) | Power density (mW cm <sup>-2</sup> ) | Specific capacity (mAh g <sub>Zn</sub> <sup>-1</sup> ) | Energy density (Wh kg <sub>Zn</sub> <sup>-1</sup> ) | Rechargeability @mA cm <sup>-2</sup>               | Refs.                                                |
|-------------------------------------------|-------------|---------------------------------|--------------------------|--------------------------------------|--------------------------------------------------------|-----------------------------------------------------|----------------------------------------------------|------------------------------------------------------|
| PEMAC@NDCN                                | CBCs        | -40                             | 70<br>-40                | 224<br>159                           | 817<br>693 (86%)                                       | 1074<br>738 (~70%)                                  | 580 cycles (96 h) @25<br>550 cycles (91 h) @25     | This work                                            |
| CPS(101)                                  | CBCs        | -20                             | 80<br>-20                | 458<br>-                             | 1.24 Ah<br>1 Ah                                        | -<br>-                                              | 1500 cycles (200 h) @25<br>1500 cycles (200 h) @25 | Nat. Energy <b>6</b> , 592-604 (2021)                |
| FeMn-DSAC                                 | PAM         | -40                             | 25<br>-40                | 184<br>30                            | 734<br>631 (86%)                                       | 888<br>725<br>(81.6%)                               | 218 cycles (80 h) @2<br>218 cycles (80 h) @2       | Angew. Chem. Int. Ed. <b>61</b> , e202115219 (2022)  |
| Ni <sub>0.8</sub> Fe <sub>0.2</sub> NSs   | PVA         | -10                             | 25<br>-10                | -<br>-                               | -<br>-                                                 | -<br>-                                              | 15 h @1<br>15 h @1                                 | ChemCatChem <b>11</b> , 6002 (2019)                  |
| NiO/CoO TINWs                             | PVA         | -10                             | 25<br>-10                | -<br>-                               | 842<br>328 (39%)                                       | 996<br>364<br>(36%)                                 | 33 h @1<br>14 h @1                                 | Angew. Chem. Int. Ed. <b>58</b> , 9459 (2019)        |
| Co@NPCP/NBC NF- 2-800                     | PAM         | -50                             | 25<br>-50                | 165<br>97                            | 800<br>620 (77%)                                       | 960                                                 | 600 cycles (100 h) @2<br>240 cycles (40 h) @2      | Energy Environ. Sci. <b>14</b> , 4451 (2021)         |
| NiCo <sub>2.148</sub> O <sub>4</sub> PNSs | PVA         | -35                             | 25<br>-35                | 83<br>-                              | -<br>-                                                 | 910                                                 | 1200 cycles (20 h) @3                              | Adv. Mater. <b>32</b> , 2001651 (2020)               |
| BFC-FC-0.2                                | PAA         | -20                             | 25<br>-20                | 160<br>80                            | 745<br>691 (92%)                                       | 915<br>798<br>(87%)                                 | 600 cycles (105 h) @2<br>-                         | Angew. Chem. Int. Ed. <b>59</b> , 4793 (2020)        |
| Pt/C + Ir/C                               | KOH         | -20                             | 20                       | 126                                  | -                                                      | -                                                   | 210 cycles @5                                      | Angew. Chem. Int. Ed. <b>60</b> , 15281 (2021)       |
|                                           | CsOH        |                                 | -20                      | 43                                   | -                                                      | -                                                   | 255 cycles @5                                      |                                                      |
| Pt/RuO <sub>2</sub>                       | PAM         | -40                             | 20                       | 43                                   | 818                                                    | -                                                   | 75 h @2                                            | Energy Stor. Mater. <b>42</b> , 88 (2021)            |
|                                           |             |                                 | -40                      | 10                                   | 743 (90%)                                              | -                                                   | 40 h @2                                            |                                                      |
| Pt/RuO <sub>2</sub>                       | PANa        | -20                             | 25                       | 60                                   | 673                                                    | -                                                   | 86 cycles (29 h) @1                                | Compos. B. Eng. 109228 (2021)                        |
|                                           |             |                                 | -20                      | 21                                   | -                                                      | -                                                   | 133 cycles (44 h) @1                               |                                                      |
| Pt/C and RuO <sub>2</sub>                 | PAM/PAA     | -20                             | 25                       | 12                                   | 663                                                    | 769                                                 | 100 cycles (10 h) @1                               | ACS Sustain. Chem. Eng. <b>8</b> , 11501 (2020)      |
|                                           |             |                                 | -20                      | 8                                    | 506 (76%)                                              | 556<br>(72%)                                        | 100 cycles (10 h) @1                               |                                                      |
| Co <sub>3</sub> O <sub>4</sub>            | PAM         | -20                             | 25<br>-20                | 73<br>52                             | 764<br>-                                               | 850<br>-                                            | 70 cycles (24 h) @1<br>-                           | ACS Appl. Mater. Interfaces <b>12</b> , 11778 (2020) |

## S4 Note S2: Computational Details and Modeling

All *ab initio* calculations were performed with the Vienna *Ab initio* Simulation Package (VASP 5.4.4) [S81-S84]. We used the BEEF-vdW [S85] exchange-correlation functional using the projector augmented wave (PAW) method [S86, S87] with a generalized gradient to accurately describe the chemisorption as well as physisorption on the catalyst surface. Integration in the Brillouin zone was performed based on the Monkhorst-Pack scheme using a  $\Gamma$ -centered  $3 \times 2 \times 1$  k-point mesh in each primitive lattice vector of the reciprocal space for geometric optimization. Plane-wave cutoff energy of 500 eV was used. Lattice constants and internal atomic positions were fully optimized until the residual forces were less than  $0.04 \text{ eV \AA}^{-1}$ . The vacuum slab space of a unit cell in the z-direction was set to  $16 \text{ \AA}$  to avoid interactions between layers. The schematics of our models are shown as Figs. S12-S13. For the convenience of identifying the active site positions, we name them by element name and Arabic number, and the details of the active site naming are included in Figs. 7a and S12.

### S4.1 OER and ORR Reaction Pathways

In this work, we used the theoretically well-defined free energy diagram (FED) approach proposed by Norskov group. It has been a generally accepted approach for electrochemical studies based on the standard density functional theory (DFT) in combination with the computational standard hydrogen electrode (SHE) model. For the investigation of various catalytic reactions on specific surface structures, we mainly consider the thermodynamic stabilities of the intermediates as the main descriptor, which determines the catalytic performance [S88, S89].

In the case of oxygen evolution reaction (OER), the four-step four-electron reaction has been generally acceptable, where this process in an alkaline environment can be described as follows.

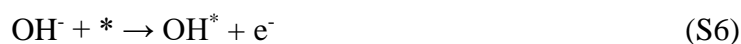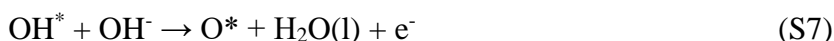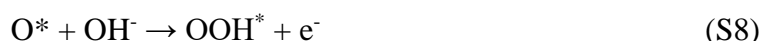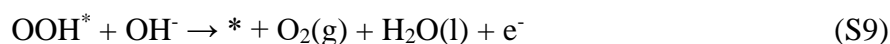

where \* refer to the active site, and  $\text{OH}^*$ ,  $\text{O}^*$ , and  $\text{OOH}^*$  are adsorbed intermediates on the surface of catalyst. Similar to the case of OER, in the case of oxygen reduction reaction (ORR), we consider the overall reaction mechanism for the complete direct four-electron process, where  $\text{O}_2$  is reduced to water without forming the hydrogen peroxide intermediate,  $\text{H}_2\text{O}_2$ . Also, this mechanism in an alkaline media is the inversed forms of reactions (S6) to (S9) for OER in the following four-step four-electron reaction,

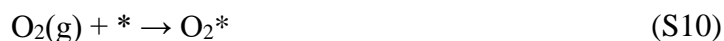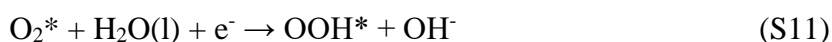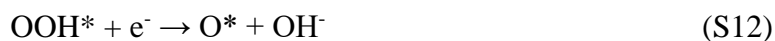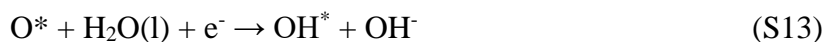



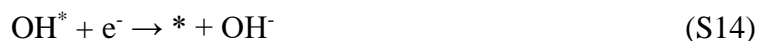

where \* represents the active site, and  $\text{O}_2^*$ ,  $\text{OOH}^*$ ,  $\text{O}^*$  and  $\text{OH}^*$  are adsorbed intermediates on the surface.

#### S4.2 Derivation of the Free Energy Relations

We calculated the reaction Gibbs free energies of the intermediates of  $\text{O}_2^*$ ,  $\text{OOH}^*$ ,  $\text{O}^*$  and  $\text{OH}^*$  on the bulk CN, NDCN, and polymer-assisted NDCN to determine the potential-determining step of OER and ORR, considering all possible active sites. For each step, the reaction Gibbs free energy  $\Delta G_{\text{ads}}$  can be expressed by

$$\Delta G_{\text{ads}} = \Delta E_{\text{ads}} + \Delta \text{ZPE} - T\Delta S \quad (\text{S15})$$

where ZPE is the zero-point energy, T is the temperature, and  $\Delta S$  is the entropy change. Using this equation (S15), we can construct a free energy diagram (FED) considering the following four-step four-electron reaction with equations at standard conditions [S90].

The reaction Gibbs free energy of each electrochemical reaction of OER in alkaline media can be expressed as follows:

$$\Delta G_1 = G_{\text{OH}^*} + \mu_{\text{e}^-} - (\mu_{\text{OH}^-} + G^*) \quad (\text{S16})$$

$$\Delta G_2 = G_{\text{O}^*} + \mu_{\text{H}_2\text{O}(\text{l})} + \mu_{\text{e}^-} - (G_{\text{OH}^*} + G^*) \quad (\text{S17})$$

$$\Delta G_3 = G_{\text{OOH}^*} + \mu_{\text{e}^-} - (G_{\text{O}^*} + \mu_{\text{OH}^-}) \quad (\text{S18})$$

$$\Delta G_4 = G^* + \mu_{\text{O}_2} + \mu_{\text{H}_2\text{O}(\text{l})} + \mu_{\text{e}^-} - (G_{\text{OOH}^*} + \mu_{\text{OH}^-}) \quad (\text{S19})$$

These reaction Gibbs free energies can be calculated by using the chemical potentials of hydroxide, electron, liquid water, and oxygen molecule ( $\mu_{\text{OH}^-}$ ,  $\mu_{\text{e}^-}$ ,  $\mu_{\text{H}_2\text{O}(\text{l})}$  and  $\mu_{\text{O}_2}$ ) and the free energies of each intermediate ( $G_{\text{OH}^*}$ ,  $G_{\text{O}^*}$ ,  $G_{\text{OOH}^*}$ ) on the surface (\*).

#### S4.3 Free Energy Diagram (FED) and Overpotential ( $\eta$ )

From the calculated  $\Delta G^{\text{OER/ORR}}$  values, we can deduce a critical parameter of electrocatalytic activity, which is the magnitude of the OER and ORR potential-determining step ( $G^{\text{OER/ORR}}$ ) in a four-step four-electron reaction. It is the specific reaction point with the largest  $\Delta G$  in the OER and ORR elementary reaction steps; i.e., the concluding step to achieve an overall downhill reaction in the free energy diagram (FED) with increasing potential (Figs. S14 and S15):

$$G^{\text{OER/ORR}} = \max[\Delta G_1, \Delta G_2, \Delta G_3, \Delta G_4]^0 \quad (\text{S20})$$

After finding the largest  $\Delta G$  value meaning the bottleneck point of ORR, we can finally get the theoretical overpotential in the alkaline condition in the following equation (S21):

$$\eta^{\text{OER/ORR}} = (G^{\text{OER/ORR}}/e) - xV, x = 0.402 \text{ V} \quad (\text{S21})$$

### Supplementary References

- [S1] Y. Liang, H. Wang, J. Zhou, Y. Li, J. Wang et al., Covalent hybrid of spinel manganese-cobalt oxide and graphene as advanced oxygen reduction electrocatalysts. *J. Am. Chem. Soc.* **134**(7), 3517-3523 (2012). <https://doi.org/10.1021/ja210924t>

- [S2] U. Paulus, T. Schmidt, H. Gasteiger, R. Behm, Oxygen reduction on a high-surface area Pt/Vulcan carbon catalyst: a thin-film rotating ring-disk electrode study. *J. Electroanal. Chem.* **495**(2), 134-145 (2001). [https://doi.org/10.1016/S0022-0728\(00\)00407-1](https://doi.org/10.1016/S0022-0728(00)00407-1)
- [S3] S. Zecevic, J. Wainright, M. Litt, S. Gojkovic, R.J. Savinell, Kinetics of O<sub>2</sub> reduction on a Pt electrode covered with a thin film of solid polymer electrolyte. *Electrochem. Soc.* **144**, 2973-2982 (1997). <https://doi.org/10.1149/1.1837946>
- [S4] O. Antoine, R.J. Durand, RRDE study of oxygen reduction on Pt nanoparticles inside Nafion®: H<sub>2</sub>O<sub>2</sub> production in PEMFC cathode conditions. *Appl. Electrochem.* **30**, 839-844 (2000). <https://doi.org/10.1023/A:1003999818560>
- [S5] Q. Xiang, J. Yu, M. Jaroniec, Preparation and enhanced visible light photocatalytic H<sub>2</sub> production activity of graphene/C<sub>3</sub>N<sub>4</sub> composites. *J. Phys. Chem. C* **115**(15), 7355-7363 (2011). <https://doi.org/10.1021/jp200953k>
- [S6] Y. Wang, X. Bai, C. Pan, J. He, Y. Zhu, Enhancement of photocatalytic activity of Bi<sub>2</sub>WO<sub>6</sub> hybridized with graphite like C<sub>3</sub>N<sub>4</sub>. *J. Mater. Chem.* **22**(23), 11568-11573 (2012). <https://doi.org/10.1039/C2JM16873A>
- [S7] J. Ou, Y. Zhang, L. Chen, Q. Zhao, Y. Meng et al., Nitrogen-rich porous carbon derived from biomass as a high performance anode material for lithium ion batteries. *J. Mater. Chem. A* **3**(12), 6534-6541 (2015). <https://doi.org/10.1039/C4TA06614F>
- [S8] Y. Zhang, X. Fan, J. Jian, D. Yu, Z. Zhang et al., A general polymer-assisted strategy enables unexpected efficient metal-free oxygen-evolution catalysis on pure carbon nanotubes. *Energy Environ. Sci.* **10**(11), 2312-2317 (2017). <https://doi.org/10.1039/C7EE01702B>
- [S9] Y. Cui, J. Zhang, G. Zhang, J. Huang, P. Liu et al., Synthesis of bulk and nanoporous carbon nitride polymers from ammonium thiocyanate for photocatalytic hydrogen evolution. *J. Mater. Chem.* **21**(34), 13032-13039 (2011). <https://doi.org/10.1039/c1jm11961c>
- [S10] S. Shinde, C. Lee, J. Jung, N. Wagh, S. Kim et al., Unveiling dual-linkage 3D hexaiminobenzene metal-organic frameworks towards long-lasting advanced reversible Zn-air batteries. *Energy Environ. Sci.* **12**(2), 727-738 (2019). <https://doi.org/10.1039/C8EE02679C>
- [S11] L. Yang, X. Zhang, L. Yu, J. Hou, Z. Zhou et al., Atomic Fe-N<sub>4</sub>/C in flexible carbon fiber membrane as binder-free air cathode for Zn-air batteries with stable cycling over 1000 h. *Adv. Mater.* **34**(5), 2105410 (2021). <https://doi.org/10.1002/adma.202105410>
- [S12] S. Shinde, J. Jung, N. Wagh, C. Lee, S. Kim et al., Ampere-hour-scale zinc-air pouch cells. *Nat. Energy* **6**, 592-604 (2021). <https://doi.org/10.1038/s41560-021-00807-8>
- [S13] N. Wagh, D. Kim, S. Kim, S. Shinde, J. Lee, Heuristic iron-cobalt-mediated robust pH-universal oxygen bifunctional lusters for reversible aqueous and flexible solid-state Zn-air cells. *ACS Nano* **15**(9), 14683-14696 (2021). <https://doi.org/10.1021/acsnano.1c04471>
- [S14] Y. Dai, J. Yu, J. Wang, Z. Shao, D. Guan et al., Bridging the charge accumulation and high reaction order for high-rate oxygen evolution and long stable Zn-air batteries. *Adv. Funct. Mater.* **32**(24), 2111989 (2022). <https://doi.org/10.1002/adfm.202111989>
- [S15] H. Jiang, J. Xia, L. Jiao, X. Meng, P. Wang et al., Ni single atoms anchored on N-doped carbon nanosheets as bifunctional electrocatalysts for Urea-assisted

- rechargeable Zn-air batteries. *Appl. Catal. B Environ.* **310**, 121352 (2022).  
<https://doi.org/10.1016/j.apcatb.2022.121352>
- [S16] L. Song, T. Zheng, L. Zheng, B. Lu, H. Chen et al., Cobalt-doped basic iron phosphate as bifunctional electrocatalyst for long-life and high-power-density rechargeable zinc-air batteries. *Appl. Catal. B Environ.* **300**, 120712 (2022).  
<https://doi.org/10.1016/j.apcatb.2021.120712>
- [S17] L. Zhang, Y. Zhu, Z. Nie, Z. Li, Y. Ye et al., Co/MoC nanoparticles embedded in carbon nanoboxes as robust trifunctional electrocatalysts for a Zn-air battery and water electrocatalysis. *ACS Nano* **15**(8), 13399–13414 (2021).  
<https://doi.org/10.1021/acsnano.1c03766>
- [S18] Z. Wu, H. Wang, P. Xiong, G. Li, T. Qiu et al., Molecularly thin nitride sheets stabilized by titanium carbide as efficient bifunctional electrocatalysts for fiber-shaped rechargeable zinc-air batteries. *Nano Lett.* **20**, 2892-2898 (2020).  
<https://doi.org/10.1021/acs.nanolett.0c00717>
- [S19] K. Tang, C. Yuan, Y. Xiong, H. Hu, M. Wu, Inverse-opal-structured hybrids of N, S-codoped-carbon-confined Co<sub>9</sub>S<sub>8</sub> nanoparticles as bifunctional oxygen electrocatalyst for on-chip all-solid-state rechargeable Zn-air batteries. *Appl. Catal. B Environ.* **260**, 118209 (2020). <https://doi.org/10.1016/j.apcatb.2019.118209>
- [S20] J. Zhang, Z. Zhao, Z. Xia, L. Dai, A metal-free bifunctional electrocatalyst for oxygen reduction and oxygen evolution reactions. *Nat. Nanotechnol.* **10**, 444-452 (2015).  
<https://doi.org/10.1038/nnano.2015.48>
- [S21] J. Yin, Y. Li, F. Lv, Q. Fan, Y. Zhao et al., NiO/CoN porous nanowires as efficient bifunctional catalysts for Zn-air batteries. *ACS Nano* **11**(2), 2275–2283 (2017).  
<https://doi.org/10.1021/acsnano.7b00417>
- [S22] S. Shinde, C. Lee, A. Sami, D. Kim, S. Lee et al., Scalable 3-D carbon nitride sponge as an efficient metal-free bifunctional oxygen electrocatalyst for rechargeable Zn-air batteries. *ACS Nano* **11**(1), 347–357 (2017). <https://doi.org/10.1021/acsnano.6b05914>
- [S23] F. Meng, H. Zhong, D. Bao, J. Yan, X. Zhang, In situ coupling of strung Co<sub>4</sub>N and intertwined N-C fibers toward free-standing bifunctional cathode for robust, efficient, and flexible Zn-Air batteries. *J. Am. Chem. Soc.* **138**(32), 10226-10231 (2016).  
<https://doi.org/10.1021/jacs.6b05046>
- [S24] X. Wang, Y. Li, T. Jin, J. Meng, L. Jiao et al., Electrospun thin-walled CuCo<sub>2</sub>O<sub>4</sub>@C nanotubes as bifunctional oxygen electrocatalysts for rechargeable Zn-air batteries. *Nano Lett.* **17**(12), 7989–7994 (2017). <https://doi.org/10.1021/acs.nanolett.7b04502>
- [S25] Z. Pei, H. Li, Y. Huang, Q. Xue, Y. Huang et al., Texturing in situ: N, S-enriched hierarchically porous carbon as a highly active reversible oxygen electrocatalyst. *Energy Environ. Sci.* **10**(3), 742-749 (2017). <https://doi.org/10.1039/C6EE03265F>
- [S26] M. Zhang, Q. Dai, H. Zheng, M. Chen, L. Dai, Novel MOF-derived Co@N-C bifunctional catalysts for highly efficient Zn-air batteries and water splitting. *Adv. Mater.* **30**(10), 1705431 (2018). <https://doi.org/10.1002/adma.201705431>
- [S27] Y. Guo, P Yuan, J. Zhang, Y. Hu, I. Amiin et al., Carbon nanosheets containing discrete Co-N<sub>x</sub>-B<sub>y</sub>-C active sites for efficient oxygen electrocatalysis and rechargeable Zn-air batteries. *ACS Nano* **12**(2), 1894–1901 (2018).  
<https://doi.org/10.1021/acsnano.7b08721>

- [S28] S. Shinde, C. Lee, J. Yu, D. Kim, S. Lee et al., Hierarchically designed 3D holey C<sub>2</sub>N aerogels as bifunctional oxygen electrodes for flexible and rechargeable Zn-air batteries. *ACS Nano* **12**(1), 596-608 (2018). <https://doi.org/10.1021/acsnano.7b07473>
- [S29] L. Ma, S. Chen, Z. Pei, Y. Huang, G. Liang et al., Single-site active iron-based bifunctional oxygen catalyst for a compressible and rechargeable zinc-air battery. *ACS Nano* **12**(2), 1949–1958 (2018). <https://doi.org/10.1021/acsnano.7b09064>
- [S30] V. Kashyap, S. Kurungot, Zirconium-substituted cobalt ferrite nanoparticle supported N-doped reduced graphene oxide as an efficient bifunctional electrocatalyst for rechargeable Zn-air battery. *ACS Catal.* **8**(4), 3715–3726 (2018). <https://doi.org/10.1021/acscatal.7b03823>
- [S31] Q. Wang, Y. Ji, Y. Lei, Y. Wang, Y. Wang et al., Pyridinic-N-dominated doped defective graphene as a superior oxygen electrocatalyst for ultrahigh-energy-density Zn-air batteries. *ACS Energy Lett.* **3**(5), 1183–1191 (2018). <https://doi.org/10.1021/acsenergylett.8b00303>
- [S32] S. Peng, X. Han, L. Li, S. Chou, D. Ji et al., Electronic and defective engineering of electrospun CaMnO<sub>3</sub> nanotubes for enhanced oxygen electrocatalysis in rechargeable zinc-air batteries. *Adv. Energy Mater.* **8**(22), 1800612 (2018). <https://doi.org/10.1002/aenm.201800612>
- [S33] Y. Jiang, Y. Deng, J. Fu, D. Lee, R. Liang et al., Interpenetrating triphase cobalt-based nanocomposites as efficient bifunctional oxygen electrocatalysts for long-lasting rechargeable Zn-air batteries. *Adv. Energy Mater.* **8**(15), 1702900 (2018). <https://doi.org/10.1002/aenm.201702900>
- [S34] C. Hang, J. Zhang, J. Zhu, W. Li, Z. Kou et al., In situ exfoliating and generating active sites on graphene nanosheets strongly coupled with carbon fiber toward self-standing bifunctional cathode for rechargeable Zn-air batteries. *Adv. Energy Mater.* **8**(16), 1703539 (2018). <https://doi.org/10.1002/aenm.201703539>
- [S35] H. Yang, J. Miao, S. Hung, J. Chen, H. Tao et al., Identification of catalytic sites for oxygen reduction and oxygen evolution in N-doped graphene materials: development of highly efficient metal-free bifunctional electrocatalyst. *Sci. Adv.* **2**(4), e1501122 (2016). <https://doi.org/10.1126/sciadv.1501122>
- [S36] Q. Liu, Y. Wang, L. Dai, J. Yao, Scalable fabrication of nanoporous carbon fiber films as bifunctional catalytic electrodes for flexible Zn-air batteries. *Adv. Mater.* **28**(15), 3000-3006 (2016). <https://doi.org/10.1002/adma.201506112>
- [S37] X. Han, X. Wu, C. Zhong, Y. Deng, N. Zhao et al., NiCo<sub>2</sub>S<sub>4</sub> nanocrystals anchored on nitrogen-doped carbon nanotubes as a highly efficient bifunctional electrocatalyst for rechargeable zinc-air batteries. *Nano Energy* **31**, 541-550 (2017). <https://doi.org/10.1016/j.nanoen.2016.12.008>
- [S38] C. Guan, A. Sumboja, H. Wu, W. Ren, X. Liu et al., Hollow Co<sub>3</sub>O<sub>4</sub> nanosphere embedded in carbon arrays for stable and flexible solid-state zinc-air batteries. *Adv. Mater.* **29**(44), 1704117 (2017). <https://doi.org/10.1002/adma.201704117>
- [S39] P. Liu, D. Gao, W. Xiao, L. Ma, K. Sun et al., Self-powered water-splitting devices by core-shell NiFe@N-graphite-based Zn-air batteries. *Adv. Funct. Mater.* **28**(14), 1706928 (2018). <https://doi.org/10.1002/adfm.201706928>
- [S40] S. Shinde, J. Yu, J. Song, Y. Nam, D. Kim et al., Highly active and durable carbon nitride fibers as metal-free bifunctional oxygen electrodes for flexible Zn-air batteries. *Nanoscale Horiz.* **2**(6), 333-341 (2017). <https://doi.org/10.1039/C7NH00058H>

- [S41] P. Chen, T. Zhou, L. Xing, K. Xu, Y. Tong et al., Atomically dispersed iron-nitrogen species as electrocatalysts for bifunctional oxygen evolution and reduction reactions. *Angew. Chem. Int. Ed.* **56**(2), 610-614 (2017). <https://doi.org/10.1002/anie.201610119>
- [S42] G. Li, X. Wang, J. Fu, J. Li, M. Park et al., Pomegranate-inspired design of highly active and durable bifunctional electrocatalysts for rechargeable metal-air batteries. *Angew. Chem. Int. Ed.* **55**(16), 4977-4982 (2016). <https://doi.org/10.1002/anie.201600750>
- [S43] T. Ma, J. Ran, S. Dai, M. Jaroniec, S. Qiao, Phosphorus-doped graphitic carbon nitrides grown in situ on carbon-fiber paper: flexible and reversible oxygen electrodes. *Angew. Chem. Int. Ed.* **54**(15), 4646-4650 (2015). <https://doi.org/10.1002/anie.201411125>
- [S44] C. Su, H. Cheng, W. Li, Z. Liu, N. Li et al., Atomic modulation of FeCo-nitrogen-carbon bifunctional oxygen electrodes for rechargeable and flexible all-solid-state zinc-air battery. *Adv. Energy Mater.* **7**(13), 1602420 (2017). <https://doi.org/10.1002/aenm.201602420>
- [S45] S. Mao, Z. Wen, T. Huang, Y. Hou, J. Chen, High-performance bi-functional electrocatalysts of 3D crumpled graphene-cobalt oxide nanohybrids for oxygen reduction and evolution reactions. *Energy Environ. Sci.* **7**(2), 609-616 (2014). <https://doi.org/10.1039/C3EE42696C>
- [S46] R. Krishnapriya, S. Praneetha, A.M. Rabel et al. Energy efficient, one-step microwave-solvothermal synthesis of highly electro-catalytic thiospinel NiCo<sub>2</sub>S<sub>4</sub>/graphene nanohybrid as a novel sustainable counter electrode material for Pt-free dye-sensitized solar cells. *J. Mater. Chem. C* **5**(12), 3146-3155, 2017. <https://doi.org/10.1039/C6TC04619C>
- [S47] G. Wang, J. Chang, S. Koul, A. Kushima, Y. Yang, CO<sub>2</sub> bubble-assisted Pt exposure in PtFeNi porous film for high-performance zinc-air battery. *J. Am. Chem. Soc.* **143**(30), 11595–11601 (2021). <https://doi.org/10.1021/jacs.1c04339>
- [S48] D. Lyu, S. Yao, A. Ali, Z. Tian, P. Tsiakaras et al., N, S codoped carbon matrix-encapsulated Co<sub>9</sub>S<sub>8</sub> nanoparticles as a highly efficient and durable bifunctional oxygen redox electrocatalyst for rechargeable Zn-air batteries. *Adv. Energy Mater.* **11**(28), 2101249 (2021). <https://doi.org/10.1002/aenm.202101249>
- [S49] H. Zhang, M. Zhao, H. Liu, S. Shi, Z. Wang et al., Ultrastable FeCo bifunctional electrocatalyst on Se-doped CNTs for liquid and flexible all-solid-state rechargeable Zn-air batteries. *Nano Lett.* **21**(5), 2255–2264 (2021). <https://doi.org/10.1021/acs.nanolett.1c00077>
- [S50] K. Cui, Q. Wang, Z. Bian, G. Wang, Y. Xu, Supramolecular modulation of molecular conformation of metal porphyrins toward remarkably enhanced multipurpose electrocatalysis and ultrahigh-performance zinc-air batteries. *Adv. Energy Mater.* **11**(46), 2102062 (2021). <https://doi.org/10.1002/aenm.202102062>
- [S51] W. Liu, J. Zhang, Z. Bai, G. Jiang, M. Li et al., Controllable urchin-like NiCo<sub>2</sub>S<sub>4</sub> microsphere synergized with sulfur-doped graphene as bifunctional catalyst for superior rechargeable Zn-air battery. *Adv. Funct. Mater.* **28**(11), 1706675 (2018). <https://doi.org/10.1002/adfm.201706675>
- [S52] B. Li, S. Zhang, B. Wang, Z. Xia, C. Tang et al., A porphyrin covalent organic framework cathode for flexible Zn-air batteries. *Energy Environ. Sci.* **11**(7), 1723-1729 (2018). <https://doi.org/10.1039/C8EE00977E>

- [S53] T. Yang, S. Venkatesan, C. Lien, J. Chang, J. Zen, Nafion/lead oxide–manganese oxide combined catalyst for use as a highly efficient alkaline air electrode in zinc–air battery. *Electrochim. Acta* **56**(17), 6205-6210 (2011). <https://doi.org/10.1016/j.electacta.2011.03.094>
- [S54] Y. Liu, S. Chen, X. Quan, H. Yu, H. Zhao et al., Boron and nitrogen codoped nanodiamond as an efficient metal-free catalyst for oxygen reduction reaction. *J. Phys. Chem. C* **117**(29), 14992-14998 (2013). <https://doi.org/10.1021/jp4044094>
- [S55] M. Prabu, K. Ketpang, S. Shanmugam, Hierarchical nanostructured NiCo<sub>2</sub>O<sub>4</sub> as an efficient bifunctional non-precious metal catalyst for rechargeable zinc-air batteries. *Nanoscale* **6**(6), 3173-3181 (2014). <https://doi.org/10.1039/c3nr05835b>
- [S56] R. Cao, R. Thapa, H. Kim, X. Xu, M. Kim et al., Promotion of oxygen reduction by a bio-inspired tethered iron phthalocyanine carbon nanotube-based catalyst. *Nat. Commun.* **4**, 2076 (2013). <https://doi.org/10.1038/ncomms3076>
- [S57] Y. Li, M. Gong, Y. Liang, J. Feng, J. Kim et al., Advanced zinc-air batteries based on high-performance hybrid electrocatalysts. *Nat. Commun.* **4**, 1805 (2013). <https://doi.org/10.1038/ncomms2812>
- [S58] V. Dhavale, S. Kurungot, Cu-Pt nanocage with 3-D electrocatalytic surface as an efficient oxygen reduction electrocatalyst for a primary Zn-air battery. *ACS Catal.* **5**(3), 1445-1452 (2015). <https://doi.org/10.1021/cs501571e>
- [S59] J. Lee, G. Park, H. Lee, S. Kim, R. Cao et al., Ketjenblack carbon supported amorphous manganese oxides nanowires as highly efficient electrocatalyst for oxygen reduction reaction in alkaline solutions. *Nano Lett.* **11**(12), 5362-5366 (2011). <https://doi.org/10.1021/nl2029078>
- [S60] L. An, Y. Li, M. Luo, J. Yin, Y. Zhao et al., Atomic-level coupled interfaces and lattice distortion on CuS/NiS<sub>2</sub> nanocrystals boost oxygen catalysis for flexible Zn-air batteries. *Adv. Funct. Mater.* **27**(42), 1703779 (2017). <https://doi.org/10.1002/adfm.201703779>
- [S61] L. Li, C. Liu, G. He, D. Fan, A. Manthiram, Hierarchical pore-in-pore and wire-in-wire catalysts for rechargeable Zn- and Li-air batteries with ultra-long cycle life and high cell efficiency. *Energy Environ. Sci.* **8**(11), 3274-3282 (2015). <https://doi.org/10.1039/C5EE02616D>
- [S62] D. Lee, J. Choi, K. Feng, H. Park, Z. Chen, Advanced extremely durable 3D bifunctional air electrodes for rechargeable zinc-air batteries. *Adv. Energy Mater.* **4**(6), 1301389 (2014). <https://doi.org/10.1002/aenm.201301389>
- [S63] X. Liu, M. Park, M. Kim, S. Gupta, G. Wu et al., Integrating NiCo alloys with their oxides as efficient bifunctional cathode catalysts for rechargeable zinc-air batteries. *Angew. Chem. Int. Ed.* **54**(33), 9654-9658 (2015). <https://doi.org/10.1002/anie.201503612>
- [S64] J. Jung, M. Risch, S. Park, M. Kim, G. Nam et al., Optimizing nanoparticle perovskite for bifunctional oxygen electrocatalysis. *Energy Environ. Sci.* **9**(1), 176-183 (2016). <https://doi.org/10.1039/C5EE03124A>
- [S65] T. Wang, G. Nam, Y. Jin, X. Wang, P. Ren et al., NiFe (Oxy) hydroxides derived from NiFe disulfides as an efficient oxygen evolution catalyst for rechargeable Zn-air batteries: the effect of surface S residues. *Adv. Mater.* **30**(27), 1800757 (2018). <https://doi.org/10.1002/adma.201800757>

- [S66] G. Fu, Y. Chen, Z. Cui, Y. Li, W. Zhou et al., Novel hydrogel-derived bifunctional oxygen electrocatalyst for rechargeable air cathodes. *Nano Lett.* **16**(10), 6516–6522 (2016). <https://doi.org/10.1021/acs.nanolett.6b03133>
- [S67] G. Fu, Z. Cui, Y. Chen, Y. Li, Y. Tang et al., Ni<sub>3</sub>Fe-N doped carbon sheets as a bifunctional electrocatalyst for air cathodes. *Adv. Energy Mater.* **7**(1), 1601172 (2017). <https://doi.org/10.1002/aenm.201601172>
- [S68] D. Lee, J. Fu, M. Park, H. Liu, A. Kashkooli et al., Self-assembled NiO/Ni(OH)<sub>2</sub> nanoflakes as active material for high-power and high-energy hybrid rechargeable battery. *Nano Lett.* **16**(3), 1794-1802 (2016). <https://doi.org/10.1021/acs.nanolett.5b04788>
- [S69] J. Wang, H. Wu, D. Gao, S. Miao, G. Wang et al., Self-assembled NiO/Ni(OH)<sub>2</sub> nanoflakes as active material for high-power and high-energy hybrid rechargeable battery. *Nano Energy* **13**, 387-396 (2015). <https://doi.org/10.1021/acs.nanolett.5b04788>
- [S70] X. Zhuang, D. Gehrig, N. Forler, H. Liang, M. Wagner et al., Conjugated microporous polymers with dimensionality-controlled heterostructures for green energy devices. *Adv. Mater.* **27**(25), 3789-3796 (2015). <https://doi.org/10.1002/adma.201501786>
- [S71] C. Li, X. Han, F. Cheng, Y. Hu, C. Chen et al., Phase and composition controllable synthesis of cobalt manganese spinel nanoparticles towards efficient oxygen electrocatalysis. *Nat. Commun.* **6**, 7345 (2015). <https://doi.org/10.1038/ncomms8345>
- [S72] Z. Chen, A. Yu, D. Higgins, H. Li, H. Wang et al., Highly active and durable core-corona structured bifunctional catalyst for rechargeable metal-air battery application. *Nano Lett.* **12**(4), 1946-1952 (2012). <https://doi.org/10.1021/nl2044327>
- [S73] T. You, C. Hu, Designing binary Ru-Sn oxides with optimized performances for the air electrode of rechargeable zinc-air batteries. *ACS Appl. Mater. Interfaces* **10**(12), 10064–10075 (2018). <https://doi.org/10.1021/acsami.7b18948>
- [S74] P. Li, C. Hu, T. You, P. Chen, Development and characterization of bi-functional air electrodes for rechargeable zinc-air batteries: effects of carbons. *Carbon* **111**, 813-821 (2017). <https://doi.org/10.1016/j.carbon.2016.10.057>
- [S75] M. Zhao, H. Liu, H. Zhang, W. Chen, H. Sun et al., A pH-universal ORR catalyst with single-atom iron sites derived from a double-layer MOF for superior flexible quasi-solid-state rechargeable Zn-air batteries. *Energy Environ. Sci.* **14**(12), 6455-6463 (2021). <https://doi.org/10.1039/D1EE01602D>
- [S76] N. Wagh, S. Shinde, C. Lee, J. Jung, D. Kim et al., Densely colonized isolated Cu-N single sites for efficient bifunctional electrocatalysts and rechargeable advanced Zn-air batteries. *Appl. Catal. B Environ.* **268**, 118746 (2020). <https://doi.org/10.1016/j.apcatb.2020.118746>
- [S77] J. Fu, F. Hassan, J. Li, D. Lee, A. Ghannoum et al., Flexible rechargeable zinc-air batteries through morphological emulation of human hair array. *Adv. Mater.* **28**(30), 6421-6428 (2016). <https://doi.org/10.1002/adma.201600762>
- [S78] A. Sumboja, M. Lübke, Y. Wang, T. An, Y. Zong et al., All-solid-state, foldable, and rechargeable Zn-air batteries based on manganese oxide grown on graphene-coated carbon cloth air cathode. *Adv. Energy Mater.* **7**(20), 1700927 (2017). <https://doi.org/10.1002/aenm.201700927>

- [S79] J. Fu, J. Zhang, X. Song, H. Zarrin, X. Tian et al., A flexible solid-state electrolyte for wide-scale integration of rechargeable zinc-air batterie. *Energy Environ. Sci.* **9**(2), 663-670 (2016). <https://doi.org/10.1039/C5EE03404C>
- [S80] J. Fu, D. Lee, F. Hassan, L. Yang, Z. Bai et al., Flexible high-energy polymer-electrolyte-based rechargeable zinc-air batteries. *Adv. Mater.* **27**(37), 5617-5622 (2015). <https://doi.org/10.1002/adma.201502853>
- [S81] G. Kresse, J. Hafner, Ab initio molecular dynamics for open-shell transition metals. *Phys. Rev. B* **48**, 13115 (1995). <https://doi.org/10.1103/PhysRevB.48.13115>
- [S82] G. Kresse, J. Hafner, Ab initio molecular-dynamics simulation of the liquid-metal-amorphous-semiconductor transition in germanium. *Phys. Rev. B* **49**, 14251-14269 (1993). <https://doi.org/10.1103/PhysRevB.49.14251>
- [S83] G. Kresse, J. Furthmuller, Efficiency of ab-initio total energy calculations for metals and semiconductors using a plane-wave basis set. *Comp. Mater. Sci.* **6**(1), 15-50 (1996). [https://doi.org/10.1016/0927-0256\(96\)00008-0](https://doi.org/10.1016/0927-0256(96)00008-0)
- [S84] G. Kresse, J. Furthmuller, Efficient iterative schemes for ab initio total-energy calculations using a plane-wave basis set. *Phys. Rev. B* **54**, 11169-11186 (1996). <https://doi.org/10.1103/PhysRevB.54.11169>
- [S85] J. Wellendorff, K. Lundgaard, A. Mogelhoj, V. Petzold, D. Landis et al., Density functionals for surface science: exchange-correlation model development with Bayesian error estimation. *Phys. Rev. B* **85**, 235149 (2012). <https://doi.org/10.1103/PhysRevB.85.235149>
- [S86] G. Kresse, D. Joubert, From ultrasoft pseudopotentials to the projector augmented-wave method. *Phys. Rev. B* **59**, 1758-1775 (1999). <https://doi.org/10.1103/PhysRevB.59.1758>
- [S87] P.E. Blochl, From ultrasoft pseudopotentials to the projector augmented-wave method. *Phys. Rev. B* **50**, 17953-17979 (1994). <https://doi.org/10.1103/PhysRevB.59.1758>
- [S88] J. Rossmeisl, Z.W. Qu, H. Zhu, G.J. Kroes, J.K. Norskov, Electrolysis of water on oxide surfaces. *J. Electroanal. Chem.* **607**, 83 (2007). <https://doi.org/10.1016/j.jelechem.2006.11.008>
- [S89] J.K. Norskov, J. Rosmeisl, A. Logadottir, L. Lindqvist, Origin of the overpotential for oxygen reduction at a fuel-cell cathode. *J. Phys. Chem. B* **108**, 17886 (2004). <https://doi.org/10.1021/jp047349j>
- [S90] I. Man, H. Su, F. Calle-Vallejo, H. Hansen, J. Martinez et al., Universality in oxygen evolution electrocatalysis on oxide surfaces. *ChemCatChem* **3**(7), 1159-1165 (2011). <https://doi.org/10.1002/cctc.201000397>
